# Supplementary material for: Impact of Probiotic B. infantis EVC001 Feeding in Premature Infants on the Gut Microbiome, Nosocomially Acquired Antibiotic Resistance, and Enteric Inflammation
Source: Front Pediatr. 2021 Feb 16;9:618009. doi: 10.3389/fped.2021.618009 (PMC7921802; doi:10.3389/fped.2021.618009)
Supplement: Supplementary file 3 [file Table_3.XLSX]

## Sheet: ARG by Hospital
ARG ID (CARD) values are in RPKM	Test-Statistic	P-Vlaue (Bonferroni)	Anaheim (mean)	Irvine (mean)
gb|AAF17880_1|ARO_3002605|aadA5	16.2336	0.0176371	0	27.4749
gb|AAB49832_1|ARO_3002636|APH(2__)-IIIa	14.3801	0.0470525	0	2.03156
gb|YP_039997_1|ARO_3003291|Staphylococcus	15.507	0.0258926	1.67838	1.99004
gb|AAA26549_1|ARO_3002549|AAC(6_)-Ic	14.8149	0.0373565	5.61263	0
gb|YP_007503840_1|ARO_3000165|tet(A)	12.8272	0.107609	15.3218	0
gb|CAD09823_1|ARO_3003479|tetR	12.8272	0.107609	24.9031	0
gb|YP_186749_1|ARO_3000489|sav1866	12.3646	0.137831	0.131634	1.53328
gb|BAA23130_1|ARO_3002493|SRT-1	12.1736	0.15268	8.37691	0
gb|BAD95494_1|ARO_3002895|SAT-1	11.6608	0.201066	23.9049	0.0847908
gb|YP_499945_1|ARO_3000839|arlS	11.2292	0.253637	1.38284	1.82698
gb|CAE00499_1|ARO_3003835|cdeA	10.7109	0.335501	0	1.15961
gb|YP_001086469_1|ARO_3003995|Clostridium	10.7109	0.335501	0	3.57743
gb|WP_009887863_1|ARO_3003357|Clostridium	10.7109	0.335501	0	11.4369
gb|CAC19929_1|ARO_3002854|dfrA1	10.3905	0.398991	19.8894	0.0799767
gb|AAP93922_1|ARO_3000569|tet(41)	10.2396	0.432989	1.09343	0
gb|ADJ67256|ARO_3003319|Staphylococcus	10.1105	0.464401	0.684879	0.911747
gb|AAU10334_1|ARO_3002628|aad(6)	9.86647	0.530202	4.21942	45.3414
gb|AAA20117_1|ARO_3000195|tetB(P)	9.54196	0.632607	2.22746	0.333209
gb|YP_001440920_1|ARO_3000746|mepR	9.40613	0.681222	0.780317	1.07196
gb|AAA22851_1|ARO_3000179|tet(L)	9.31158	0.717286	0.239206	13.5795
gb|AAA25293_1|ARO_3000192|tetS	8.97215	0.863495	0.2537	0
gb|YP_039996_1|ARO_3003285|Staphylococcus_gb|YP_039996_1|ARO_3003287|Staphylococcus	9.12571	0.79393	0.764178	1.18511
gb|AAB53445_1|ARO_3002897|SAT-4	8.90291	0.896855	1.04036	9.99273
gb|AAV80464_1|ARO_3000565|tet(38)	8.94531	0.876278	1.1328	1.58951
gb|CAP12359_2|ARO_3002452|OKP-B-19	8.90182	0.897394	6.90781	5.44805
gb|ABG91835_1|ARO_3002860|dfrA17	8.51829	1	0.718672	4.82762
gb|CAQ03505_1|ARO_3001338|SHV-100	8.47146	1	24.9119	13.1199
gb|AAC75089_1|ARO_3003577|PmrE	8.16573	1	117.81	67.9795
gb|NP_312937_1|ARO_3003288|Escherichia	8.11019	1	198.517	154.255
gb|AAC77033_1|ARO_3003381|Escherichia	7.89934	1	176.272	134.408
gb|CAE51745_1|ARO_3000168|tet(D)	7.72194	1	4.89641	0
gb|YP_005226137_1|ARO_3003966|Klebsiella	7.74037	1	94.4477	55.4063
gb|AAA25655_1|ARO_3002670|cat	7.4859	1	0.023032	0.992079
gb|AAD12753_1|ARO_3000177|tet(J)	7.51569	1	0.0243868	1.93065
gb|WP_001025093|ARO_3003323|Staphylococcus	7.25343	1	1.17221	1.74823
gb|AAL08441_1|ARO_3002670|cat	7.28552	1	18.8284	0.0906403
gb|BAE77933_1|ARO_3000518|CRP	7.21663	1	181.088	143.696
gb|YP_500802_1|ARO_3003074|Staphylococcus	6.76512	1	1.33675	1.82747
gb|AGV10830_1|ARO_3002647|APH(3_)-IIIa	6.68844	1	0.91148	9.66802
gb|AAS13767_1|ARO_3003839|Mrx	6.6455	1	2.80397	18.3735
gb|ABR75897_1|ARO_3003373|Klebsiella	6.61617	1	42.931	28.0889
gb|BAA03776_1|ARO_3000316|mphA	6.49714	1	3.07389	20.4988
gb|YP_001315192_1|ARO_3000347|ErmA	6.39044	1	4.81931	0.0182503
gb|NP_358469_1|ARO_3000822|pmrA	6.25149	1	0.0199137	0.874561
gb|YP_040771_1|ARO_3003315|Staphylococcus	6.28672	1	1.03709	1.28872
gb|ABR76005_1|ARO_3003380|Klebsiella	6.14803	1	61.7379	36.6619
gb|AAL12234_1|ARO_3003552|fusB	6.09959	1	1.40746	0.735274
gb|NP_252408_1|ARO_3004056|ArmR	5.87845	1	0.0669856	0
gb|Q0SSM7|ARO_3003773|Clostridium	5.95491	1	0.446826	0.23216
gb|YP_001332362_1|ARO_3000838|arlR	5.89803	1	1.06251	1.31417
gb|AAA20116_1|ARO_3000180|tetA(P)	5.85925	1	1.85063	1.07871
gb|YP_039482_1|ARO_3003301|Staphylococcus	5.78838	1	1.64846	2.23183
gb|CAC41008_1|ARO_3004041|Klebsiella	5.68529	1	33.9809	19.4979
gb|ABG77965_1|ARO_3004042|Enterobacter	5.44197	1	175.093	142.515
gb|AAX14803_1|ARO_3000782|adeK	5.30041	1	0	0.00491956
gb|AAF86691_1|ARO_3001816|ACC-2	5.30041	1	0	0.0393974
gb|AEM44648_1|ARO_3001970|CTX-M-110	5.30041	1	0	52.1874
gb|AAY32951_1|ARO_3002837|lnuC	5.05543	1	0.221874	0.437185
gb|AHA80960_1|ARO_3001388|TEM-211	4.90301	1	74.2159	44.3156
gb|ACC85616_1|ARO_3002804|FosA2	4.84017	1	0.0875636	0.128797
gb|NP_251185_1|ARO_3000805|OprN	4.67033	1	0.0302818	0
gb|AAA86871_1|ARO_3002841|vatB	4.67033	1	1.23851	0
gb|ACI32877_1|ARO_3002859|dfrA14	4.67033	1	5.5968	0
gb|YP_003281576_1|ARO_3000815|mgrA	4.51737	1	7.36527	20.8407
gb|YP_002743273_1|ARO_3000616|mel	4.55618	1	7.60228	3.18703
gb|AAC23556_1|ARO_3002660|APH(6)-Id	4.51967	1	22.956	17.9431
gb|NP_460903_1|ARO_3000826|sdiA	4.49171	1	84.4412	69.2443
gb|AAA26613_1|ARO_3002670|cat	4.23888	1	0.0082277	2.51622
gb|NP_250710_1|ARO_3003709|mexZ	4.07245	1	0.0584944	0
gb|NP_251217_1|ARO_3004074|MuxB	4.07245	1	0.0906028	0
gb|AAU95768_1|ARO_3000026|mepA	4.1533	1	1.07141	1.61778
gb|YP_039483_1|ARO_3003296|Staphylococcus	4.11544	1	1.51666	2.2104
gb|CDO13981_1|ARO_3003585|Klebsiella	4.13824	1	73.2863	50.7613
gb|BAJ09383_1|ARO_3003046|qacA	3.99727	1	16.8502	77.8563
gb|NP_417169_1|ARO_3000516|emrR	3.96388	1	156.246	143.55
gb|YP_002325611_1|ARO_3000775|adeB	3.52149	1	0	0.00310408
gb|CBW46935_1|ARO_3001959|CTX-M-100	3.52149	1	0	0.00440137
gb|AEA37904_1|ARO_3003112|lsaC	3.52149	1	0	0.0130494
gb|BAE06005_1|ARO_3003704|mexM	3.47865	1	0.0268006	0
gb|AAB41956_1|ARO_3000800|MexC	3.47865	1	0.0391727	0
gb|NP_249649_1|ARO_3003686|Pseudomonas	3.47865	1	0.0435994	0
gb|NP_252367_1|ARO_3003692|mexJ	3.47865	1	0.0464815	0
gb|ADT64081_1|ARO_3000813|MexS	3.47865	1	0.0529434	0
gb|AAG07762_1|ARO_3003030|mexV	3.47865	1	0.0541128	0
gb|NP_249397_1|ARO_3002679|catB7	3.47865	1	0.0559643	0
gb|AAA74437_1|ARO_3000378|MexB	3.47865	1	0.0568364	0
gb|NP_253005_1|ARO_3004069|MvaT	3.47865	1	0.0596952	0
gb|AAB41957_1|ARO_3000801|MexD	3.47865	1	0.0690108	0
gb|NP_249871_1|ARO_3003896|Pseudomonas	3.47865	1	0.0704809	0
gb|AEX49906_1|ARO_3003583|basS	3.47865	1	0.0714595	0
gb|NP_249820_1|ARO_3000149|FosA	3.47865	1	0.0720076	0
gb|ACQ82810_1|ARO_3002502|PDC-5	3.47865	1	0.0825437	0
gb|NP_249116_1|ARO_3000377|MexA	3.47865	1	0.0844691	0
gb|SIP52035_1|ARO_3004054|Pseudomonas	3.47865	1	0.0891982	0
gb|NP_252264_1|ARO_3000819|nalD	3.47865	1	0.131853	0
gb|AAF86219_1|ARO_3000375|ErmB	3.67331	1	8.2012	18.266
gb|AJE60855_1|ARO_3003209|FosA5	3.79083	1	40.3295	30.7094
gb|YP_208874_1|ARO_3003930|rpsJ	3.18293	1	0.0184711	0.731423
gb|NP_252368_1|ARO_3003710|mexL	2.8889	1	0.0433791	0
gb|NP_249118_1|ARO_3000379|OprM	2.8889	1	0.0458516	0
gb|NP_251858_1|ARO_3003684|Pseudomonas	2.8889	1	0.0468259	0
gb|BAE06006_1|ARO_3003705|mexN	2.8889	1	0.0473233	0
gb|NP_253677_1|ARO_3004038|Pseudomonas	2.8889	1	0.047638	0
gb|AAG07763_1|ARO_3003031|mexW	2.8889	1	0.052825	0
gb|NP_251215_1|ARO_3004072|OpmB	2.8889	1	0.0556549	0
gb|NP_251182_1|ARO_3000814|MexT	2.8889	1	0.0567452	0
gb|NP_253654_1|ARO_3003685|Pseudomonas	2.8889	1	0.0589639	0
gb|AAB41958_1|ARO_3000802|OprJ	2.8889	1	0.0596614	0
gb|CAA62365_1|ARO_3002645|APH(3_)-IIb	2.8889	1	0.0641147	0
gb|BAE06009_1|ARO_3003700|opmE	2.8889	1	0.0646676	0
gb|NP_248847_1|ARO_3003680|TriB	2.8889	1	0.0651851	0
gb|NP_252896_1|ARO_3000808|mexI	2.8889	1	0.0698849	0
gb|NP_252897_1|ARO_3000809|opmD	2.8889	1	0.0736914	0
gb|NP_250052_1|ARO_3004077|PmpM	2.8889	1	0.0760306	0
gb|BAE06008_1|ARO_3003699|mexQ	2.8889	1	0.0790585	0
gb|NP_248848_1|ARO_3003681|TriC	2.8889	1	0.0965391	0
gb|NP_253464_1|ARO_3003582|basR	2.8889	1	0.0970509	0
gb|BAE06007_1|ARO_3003698|mexP	2.8889	1	0.102816	0
gb|NP_248846_1|ARO_3003679|TriA	2.8889	1	0.13223	0
gb|AAB95639_1|ARO_3000118|vgaB	3.14235	1	1.08708	0.000633387
gb|AAA98296_1|ARO_3000250|ErmC	2.94454	1	28.9751	115.248
gb|YP_001693237_1|ARO_3003922|oqxA	2.88122	1	72.7073	46.4405
gb|CAA38525_1|ARO_3002535|AAC(3)-IIc	2.65228	1	0.0100868	8.69129
gb|ABK33456_1|ARO_3002639|APH(3__)-Ib	2.65763	1	33.6544	28.7411
gb|AAC64365_1|ARO_3000230|ANT(2__)-Ia	2.60049	1	0.027111	0.000166099
gb|NP_252410_1|ARO_3000818|nalC	2.60049	1	0.145312	0.000182427
gb|ALL09868|ARO_3003092|Enterococcus	2.55324	1	0.0453535	0.741682
gb|NP_359110_1|ARO_3003042|Streptococcus	2.50775	1	0.00165534	0.0162225
gb|AAO04716_1|ARO_3002865|dfrC	2.52354	1	24.5317	106.734
gb|NP_418486_1|ARO_3003511|Escherichia	2.51927	1	71.1165	66.1712
gb|AAD51348_1|ARO_3003066|smeR	2.30318	1	0.00293647	0
gb|NP_251218_1|ARO_3004073|MuxA	2.30318	1	0.0395221	0
gb|NP_251216_1|ARO_3004075|MuxC	2.30318	1	0.0434918	0
gb|NP_250709_1|ARO_3002982|amrA	2.30318	1	0.0447173	0
gb|NP_252244|ARO_3002985|arnA	2.30318	1	0.045774	0
gb|AAG07064_1|ARO_3003693|mexK	2.30318	1	0.0551498	0
gb|NP_253290_1|ARO_3000820|nfxB_gb|NP_253290_1|ARO_3004059|Type_gb|NP_253290_1|ARO_3004060|Type	2.30318	1	0.0590653	0
gb|BAA34300_1|ARO_3003033|mexY	2.30318	1	0.0602361	0
gb|NP_253661_1|ARO_3003682|OpmH	2.30318	1	0.0697649	0
gb|NP_251184_1|ARO_3000804|MexF	2.30318	1	0.0705427	0
gb|AAQ76277_1|ARO_3001796|OXA-50	2.30318	1	0.0748659	0
gb|NP_252894_1|ARO_3000806|mexG	2.30318	1	0.0767067	0
gb|NP_252895_1|ARO_3000807|mexH	2.30318	1	0.191417	0
gb|AIT76100_1|ARO_3002152|DHA-21	2.30318	1	2.36836	0
gb|AAK11270_1|ARO_3003385|Enterobacter	2.30318	1	3.62066	0
gb|CDJ72593|ARO_3003889|Escherichia	2.46073	1	154.147	155.455
gb|WP_002530866_1|ARO_3003974|Propionibacterium	2.22702	1	2.76678	4.25466
gb|AAS68233_1|ARO_3000391|norA	2.21586	1	27.3778	75.9215
gb|NP_249115_1|ARO_3000506|mexR	2.044	1	0.0555006	0.000589149
gb|ANK04027_1|ARO_3003838|gadW	2.04003	1	35.6736	28.5445
gb|NP_417544_5|ARO_3000024|patA	1.95823	1	67.0583	67.2635
gb|BAA15934_1|ARO_3000829|baeS	1.87843	1	44.3208	91.8582
gb|YP_002325610_1|ARO_3000774|adeA	1.75472	1	0	0.00075031
gb|ACR57831_1|ARO_3003022|dfrB3	1.75472	1	0	0.000953469
gb|ADM92606_1|ARO_3000549|adeS	1.75472	1	0	0.00212588
gb|ADM92605_1|ARO_3000553|adeR	1.75472	1	0	0.00230036
gb|YP_001713101_1|ARO_3000779|adeH	1.75472	1	0	0.0023694
gb|EEX02086|ARO_3004089|ANT(3__)-IIa	1.75472	1	0	0.00684216
gb|AAF01499_1|ARO_3000193|tetT	1.75472	1	0	0.0107974
gb|AAA27471_1|ARO_3000205|tetX	1.75472	1	0	2.67735
gb|AAO16462_1|ARO_3000167|tet(C)	1.72145	1	0.0147647	0
gb|NP_251183_1|ARO_3000803|MexE	1.72145	1	0.0466776	0
gb|NP_249870_1|ARO_3003895|Pseudomonas	1.72145	1	0.0875212	0
gb|AEJ33969_1|ARO_3000410|sul1	1.75807	1	14.156	24.8585
gb|AAC75315_1|ARO_3002985|arnA	1.75396	1	46.4006	27.9652
gb|AAC76539_1|ARO_3000796|mdtF	1.74673	1	59.9695	57.9786
gb|NP_899170_1|ARO_3000599|Erm(33)	1.76527	1	217.487	876.19
gb|AAC75314_1|ARO_3003578|PmrF	1.7042	1	45.004	38.9828
gb|YP_001693238|ARO_3003923|oqxB	1.67206	1	114.828	81.3954
gb|AAC74149_2|ARO_3001216|mdtH	1.65482	1	53.3306	52.2844
gb|AAK01167_1|ARO_3002819|msrC	1.60279	1	0.0319149	0.648319
gb|AFK58561_1|ARO_3003079|Enterococcus	1.60279	1	0.0491132	1.02447
gb|YP_006374661_1|ARO_3003438|Enterococcus	1.60279	1	0.0815666	1.20545
gb|AAB63533_1|ARO_3002556|AAC(6_)-Ii	1.60279	1	0.0893818	1.443
gb|CAA79727_1|ARO_3000191|tetQ	1.60553	1	6.29943	1.93277
gb|AAL59753_1|ARO_3000412|sul2	1.62082	1	21.5111	20.3384
gb|AAC37034_1|ARO_3000522|ErmG	1.53807	1	4.0406	0.00710904
gb|CAJ67339_1|ARO_3000186|tetM	1.55124	1	12.0411	5.58946
gb|AFH35853_1|ARO_3001328|mdfA	1.56091	1	29.7857	31.2573
gb|AAC75136_1|ARO_3000793|mdtB	1.53731	1	144.472	143.994
gb|BAA37152_1|ARO_3003702|Pseudomonas	1.51121	1	0.0616585	0.00372421
gb|NP_414995_1|ARO_3000216|acrB	1.51292	1	133.479	137.986
gb|AET10445_1|ARO_3004033|tetB(46)	1.47051	1	0.0502518	0.0720671
gb|NP_461214_1|ARO_3003926|Salmonella	1.35289	1	12.7229	21.5935
gb|AFK13827_1|ARO_3000825|robA	1.35924	1	17.6746	7.72936
gb|NP_312864_1|ARO_3000830|cpxA	1.34809	1	78.8462	76.7333
gb|BAA11237_1|ARO_3000254|emrY	1.33429	1	63.2926	60.7644
gb|NP_416292_1|ARO_3002818|msrB	1.32662	1	34.4607	34.172
gb|AJF83452_1|ARO_3003574|LpxC	1.28007	1	0.0934621	0.0143166
gb|NP_415372_1|ARO_3003751|Escherichia	1.25876	1	21.0513	21.1679
gb|NP_309766_1|ARO_3000676|H-NS	1.25504	1	35.8145	35.8991
gb|AAC75138_1|ARO_3001330|mdtD	1.25504	1	56.5096	56.5625
gb|AAC76733_1|ARO_3001215|mdtL	1.27853	1	77.9918	78.2705
gb|CDJ73208|ARO_3003890|Escherichia	1.26953	1	255.93	239.959
gb|AAG03357_1|ARO_3000596|ErmX	1.22101	1	0.274705	3.88173
gb|BAE77781_1|ARO_3000795|mdtE	1.22663	1	74.0531	73.2677
gb|BAE78084_1|ARO_3003548|mdtN	1.22641	1	120.5	116.02
gb|CCP46182_1|ARO_3003035|mfpA	1.1437	1	0.0010397	0
gb|AHA41505_1|ARO_3002930|vanRO	1.1437	1	0.00240765	0
gb|AAD51344_1|ARO_3003051|smeA	1.1437	1	0.00260055	0
gb|CAC41371_1|ARO_3000196|tet32	1.1437	1	0.00491753	0
gb|AAB53259_1|ARO_3002671|cat-TC	1.1437	1	0.0102043	0
gb|AAC36915_1|ARO_3000593|ErmQ	1.18645	1	0.0195603	0.0166159
gb|YP_001706894_1|ARO_3000777|adeF	1.18888	1	0.0331851	0.00644492
gb|WP_004746565_1|ARO_3003848|ADC-2	1.1437	1	0.0505758	0
gb|AAC41449_1|ARO_3001398|OXA-3	1.1437	1	0.0613219	0
gb|YP_007503908_1|ARO_3003306|Morganella	1.1437	1	0.476271	0
gb|NP_311275_1|ARO_3000832|evgA	1.15738	1	35.4041	35.5568
gb|AAC75733_1|ARO_3000074|emrB	1.13518	1	56.884	56.4046
gb|YP_490321_1|ARO_3000828|baeR	1.12327	1	43.3427	42.8336
gb|YP_006938491_1|ARO_3003905|ANT(4_)-Ib	1.10354	1	9.1516	37.9229
gb|AAD01867_1|ARO_3002875|dfrE	1.10521	1	34.937	37.6574
gb|YP_491362_1|ARO_3003386|Escherichia	1.10491	1	182.123	185.674
gb|CAE51638_1|ARO_3002641|APH(3_)-Ia	1.08997	1	1.61554	1.60882
gb|AAC76093_1|ARO_3002986|bacA	1.0546	1	152.446	155.787
gb|YP_491919_1|ARO_3000508|gadX	1.0299	1	8.47485	7.9831
gb|NP_417969_1|ARO_3003834|gadE	1.02609	1	32.1756	32.3963
gb|BAE78083_1|ARO_3003549|mdtO	1.0442	1	42.5948	45.8791
gb|NP_414997_1|ARO_3003807|Escherichia	1.02255	1	48.4272	49.0665
gb|ACN32294_1|ARO_3000237|tolC	1.04001	1	50.3501	51.8516
gb|YP_001715981_1|ARO_3000172|FosB	0.988316	1	0.00834857	0.00583939
gb|AFK58562_1|ARO_3003078|Enterococcus	0.944994	1	0.0441493	1.11488
gb|AAT46077_1|ARO_3000300|lsaA	0.945533	1	15.7625	23.1053
gb|AET15272_1|ARO_3003197|aadA25	0.955333	1	36.6003	10.7828
gb|YP_490697_1|ARO_3000491|acrD	0.947914	1	187.909	201.373
gb|AAC77293_1|ARO_3001214|mdtM	0.932042	1	8.73806	13.5377
gb|BAE78116_1|ARO_3003576|PmrC	0.936174	1	42.0893	55.0892
gb|BAA16547_1|ARO_3000027|emrA	0.924697	1	124.357	125.847
gb|NP_358969_1|ARO_3000025|patB	0.849691	1	0.00433039	0.0113377
gb|AAC75429_1|ARO_3000833|evgS	0.830375	1	53.9361	56.2402
gb|AAC76297_1|ARO_3000499|acrE	0.831153	1	136.603	142.159
gb|BAE78082_1|ARO_3003550|mdtP	0.820095	1	99.4248	136.244
gb|BAA11236_1|ARO_3000206|emrK	0.762415	1	38.2986	47.648
gb|AGN33258_1|ARO_3002829|vgaA	0.748636	1	0.909697	1.59376
gb|AAC76298_1|ARO_3000502|acrF	0.729731	1	52.349	54.1893
gb|AEL31272_1|ARO_3002756|QnrB41	0.693727	1	2.39533	1.58039
gb|AAD51347_1|ARO_3003067|smeS	0.569892	1	0.000120506	0
gb|AAD51346_1|ARO_3003053|smeC	0.569892	1	0.000410308	0
gb|NP_216424_1|ARO_3003392|Mycobacterium	0.569892	1	0.000515071	0
gb|AJD73064_1|ARO_3001301|RlmA(II)	0.569892	1	0.000575383	0
gb|CAC14595_1|ARO_3003056|smeE	0.569892	1	0.000584119	0
gb|ACH50230_1|ARO_3003379|Salmonella	0.569892	1	0.000822562	0
gb|AHB39758_1|ARO_3003013|dfrA15	0.569892	1	0.00154232	0
gb|WP_004025678_1|ARO_3003305|Ureaplasma	0.569892	1	0.00210134	0
gb|AAD51345_1|ARO_3003052|smeB	0.569892	1	0.0031153	0
gb|AKJ52802_1|ARO_3003310|Mycoplasma	0.569892	1	0.00434675	0
gb|ADX95999_1|ARO_3002873|FosB3	0.569892	1	0.0121652	0
gb|AGI42804_1|ARO_3002836|lnuB	0.569892	1	0.0257284	0
gb|AFU35063_1|ARO_3002630|ANT(9)-Ia	0.569892	1	0.0324407	0
gb|AFU35065_1|ARO_3003206|lsaE	0.569892	1	0.0324407	0
gb|CAA52904_1|ARO_3002688|catS	0.569892	1	0.457429	0
gb|AIT76113_1|ARO_3002174|MIR-9	0.646273	1	9.77397	6.30469
gb|BAC11911_1|ARO_3003551|emeA	0.640196	1	15.8096	17.9489
gb|NP_415222_1|ARO_3003841|kdpE	0.566132	1	17.3223	26.939
gb|CDO61513_1|ARO_3003948|efrA	0.643392	1	18.8228	21.2101
gb|AAC74603_2|ARO_3003378|Escherichia	0.570484	1	26.0275	28.1927
gb|BAE15963_1|ARO_3002868|dfrG	0.559479	1	0.481066	6.89468
gb|CDO61516_1|ARO_3003949|efrB	0.550355	1	9.60251	10.8881
gb|YP_489321_1|ARO_3001329|mdtG	0.522922	1	178.07	178.764
gb|YP_008997285_1|ARO_3000615|mefA	0.507819	1	0.00641989	0.15849
gb|YP_001245420_1|ARO_3000215|mecR1	0.492309	1	8.24656	18.1929
gb|ALH22601_1|ARO_3000620|adeL	0.458902	1	0.0958875	0.00781484
gb|AAC75137_1|ARO_3000794|mdtC	0.426266	1	125.922	134.615
gb|AMP35312_1|ARO_3002831|vgaC	0.359243	1	78.7452	45.2469
gb|AET10444_1|ARO_3004032|tetA(46)	0.348049	1	0.0540607	0.0805266
gb|NP_462096_1|ARO_3003317|Salmonella	0.349626	1	248.186	241.436
gb|NP_462089_1|ARO_3003939|Salmonella	0.335199	1	0.39764	0.511709
gb|NP_415632_1|ARO_3003844|mfd	0.333445	1	43.5714	49.2086
gb|CAA77936_1|ARO_3004039|Escherichia	0.341362	1	46.4681	56.1078
gb|YP_489794_1|ARO_3000263|marA	0.334851	1	119.578	117.062
gb|AAA98096_1|ARO_3000595|ErmT	0.327971	1	0.0480704	0.0736244
gb|YP_002320475_1|ARO_3000780|adeI	0.311778	1	0.13489	0.00864623
gb|AIL15701|ARO_3003775|Escherichia	0.314512	1	138.204	146.234
gb|CAA63498_1|ARO_3002670|cat	0.28865	1	0.118767	1.43076
gb|YP_001569085_1|ARO_3000621|PC1	0.263127	1	2.87503	12.7206
gb|CAC14596_1|ARO_3003057|smeF	0.233487	1	0.00392509	0.000702517
gb|BAD89844_2|ARO_3000753|abeM	0.233487	1	0.0765603	0.00510211
gb|AAX14802_1|ARO_3000781|adeJ	0.236378	1	0.0799315	0.0129079
gb|WP_014550864_1|ARO_3003953|hmrM	0.213194	1	0.0032799	0.0046529
gb|WP_041918279_1|ARO_3003925|Haemophilus	0.194123	1	5.15535	0.0675559
gb|ACT97371_1|ARO_3003097|CfxA6	0.197151	1	7.4803	7.31912
gb|AAL78275_1|ARO_3002391|OXY-1-3	0.196921	1	8.80007	22.8707
gb|AAA26793|ARO_3003748|oleC	0.162021	1	0.00340819	0.00428562
gb|BAJ17544_1|ARO_3002069|CMY-59	0.162964	1	7.38688	2.00789
gb|EFF04178_1|ARO_3000309|emrD	0.158715	1	190.522	196.618
gb|CCP46624_1|ARO_3003326|Mycobacterium_gb|AAK48268_1|ARO_3003465|Mycobacterium	0.153381	1	0.00331535	0.0128125
gb|ACA23185_1|ARO_3000194|tetW	0.144979	1	0.822494	1.80692
gb|AAA88675_1|ARO_3000498|ErmF	0.144979	1	0.905604	7.40683
gb|BAE77595_1|ARO_3003303|Escherichia	0.138575	1	74.3271	82.04
gb|YP_008997281_1|ARO_3002626|ANT(6)-Ia	0.131435	1	0.924983	5.02421
gb|NP_863643_1|ARO_3002597|AAC(6_)-Ie-APH(2__)-Ia	0.125613	1	16.9507	32.8464
gb|AAC76296_1|ARO_3000656|acrS	0.126287	1	48.9314	55.965
gb|NP_415434_1|ARO_3003950|msbA	0.125806	1	115.306	125.81
gb|WP_014065640_1|ARO_3003924|Haemophilus	0.113734	1	2.17428	0.023387
gb|CAA67349_1|ARO_3003359|Streptomyces	0.0914396	1	0.020657	0.124153
gb|YP_003283625_1|ARO_3000178|tet(K)	0.092326	1	0.772173	10.8297
gb|NP_416715_1|ARO_3003952|YojI	0.0901747	1	40.3901	50.561
gb|NP_415611_1|ARO_3004049|antibiotic	0.0913202	1	175.763	180.332
gb|NP_414618_4|ARO_3003843|leuO	0.086846	1	50.7167	59.4894
gb|YP_001706893_1|ARO_3000778|adeG	0.0269695	1	0.0854479	0.00306051
gb|CAL44992_1|ARO_3002835|lnuA	0.0250775	1	1.20121	0.0161024
gb|ACT97415_1|ARO_3002999|CblA-1	0.0236954	1	0.152956	0.0122356
gb|AAC75135_2|ARO_3000792|mdtA	0.0143439	1	38.6226	63.2729
gb|YP_002325052_1|ARO_3000768|abeS	0.0115077	1	0.0426614	0.00492957
gb|NP_415804_1|ARO_3004045|antibiotic	0.00991542	1	61.7181	66.4051
gb|AGC51118_1|ARO_3000617|mecA	0.00646511	1	13.8777	36.9962
gb|AAD01868_1|ARO_3002867|dfrF	0.00518749	1	1.62341	0.588599
gb|AAA23033_1|ARO_3000190|tetO	0.00407998	1	3.04142	1.06438
gb|AFK13828_1|ARO_3000823|ramA	0.00503984	1	9.75893	1.60842
gb|YP_005228001_1|ARO_3003968|Klebsiella	0.00442646	1	18.9468	15.9848
gb|AAN82549_1|ARO_3003369|Escherichia	0.00232784	1	560.671	533.019
gb|CAC14594_1|ARO_3003055|smeD	0.0014613	1	0.0176874	0.00356903
gb|AHV80711_1|ARO_3002863|dfrA8	0.000477269	1	7.58598	4.24418
gb|YP_489201_1|ARO_3003390|Escherichia	0.000525795	1	23.9711	24.6689
gb|NP_373280_1|ARO_3000124|mecI	0.000285388	1	2.6537	0.717815
