# Supplementary material for: Impact of Probiotic B. infantis EVC001 Feeding in Premature Infants on the Gut Microbiome, Nosocomially Acquired Antibiotic Resistance, and Enteric Inflammation
Source: Front Pediatr. 2021 Feb 16;9:618009. doi: 10.3389/fped.2021.618009 (PMC7921802; doi:10.3389/fped.2021.618009)
Supplement: Supplementary file 4 [file Table_4.XLS]

## Sheet: X1
ARG ID (CARD)	Controls before transfer	Controls after transfer	X1 before transfer	X1 after transfer
gb|BAE77933_1|ARO_3000518|CRP	0.2	0.802632	0	0.428571
gb|CDJ73208|ARO_3003890|Escherichia	0.2	0.763158	0	0.428571
gb|NP_312937_1|ARO_3003288|Escherichia	0.2	0.75	0	0.428571
gb|NP_460903_1|ARO_3000826|sdiA	0.3	0.776316	0	0.428571
gb|AAK01167_1|ARO_3002819|msrC	0.3	0.0263158	0	0
gb|ALL09868|ARO_3003092|Enterococcus	0.3	0.0263158	0	0
gb|AFK58561_1|ARO_3003079|Enterococcus	0.3	0.0263158	0	0
gb|AFK58562_1|ARO_3003078|Enterococcus	0.3	0.0263158	0	0
gb|YP_006374661_1|ARO_3003438|Enterococcus	0.3	0.0263158	0	0
gb|AAB63533_1|ARO_3002556|AAC(6_)-Ii	0.3	0.0263158	0	0
gb|NP_373280_1|ARO_3000124|mecI	0.3	0.223684	0	0.857143
gb|AGV10830_1|ARO_3002647|APH(3_)-IIIa	0.8	0.342105	0	0
gb|AAB53445_1|ARO_3002897|SAT-4	0.8	0.355263	0	0
gb|AAG03357_1|ARO_3000596|ErmX	0.7	0.223684	0	0.571429
gb|CDO13981_1|ARO_3003585|Klebsiella	0.1	0.631579	0	0.428571
gb|ABG77965_1|ARO_3004042|Enterobacter	0.4	0.776316	0	0.428571
gb|CAE00499_1|ARO_3003835|cdeA	0.3	0.0394737	0	0
gb|YP_001086469_1|ARO_3003995|Clostridium	0.3	0.0394737	0	0
gb|WP_009887863_1|ARO_3003357|Clostridium	0.3	0.0394737	0	0
gb|AAU10334_1|ARO_3002628|aad(6)	0.7	0.302632	0	0
gb|CAA38525_1|ARO_3002535|AAC(3)-IIc	0.2	0.0131579	0	0
gb|AEM44648_1|ARO_3001970|CTX-M-110	0.2	0.0131579	0	0
gb|AAL12234_1|ARO_3003552|fusB	0.1	0.223684	0	0.714286
gb|NP_461214_1|ARO_3003926|Salmonella	0.2	0.5	0	0
gb|NP_417169_1|ARO_3000516|emrR	0.4	0.75	0	0.428571
gb|AAA23033_1|ARO_3000190|tetO	0.4	0.0921053	0	0
gb|AAC77033_1|ARO_3003381|Escherichia	0.2	0.605263	0	0.285714
gb|NP_418486_1|ARO_3003511|Escherichia	0.2	0.631579	0	0.428571
gb|YP_186749_1|ARO_3000489|sav1866	0.3	0.144737	0	0.571429
gb|AAY32951_1|ARO_3002837|lnuC	0.3	0.0526316	0	0
gb|AAF01499_1|ARO_3000193|tetT	0.1	0	0	0
gb|YP_001693238|ARO_3003923|oqxB	0.1	0.552632	0	0.428571
gb|YP_005226137_1|ARO_3003966|Klebsiella	0.1	0.407895	0	0
gb|BAA15934_1|ARO_3000829|baeS	0	0.315789	0	0
gb|BAE15963_1|ARO_3002868|dfrG	0.5	0.157895	0	0.142857
gb|CAC41008_1|ARO_3004041|Klebsiella	0.1	0.368421	0	0
gb|ABR76005_1|ARO_3003380|Klebsiella	0.1	0.368421	0	0
gb|ABR75897_1|ARO_3003373|Klebsiella	0.1	0.486842	0	0.285714
gb|NP_415804_1|ARO_3004045|antibiotic	0.3	0.644737	0	0.428571
gb|AAA20116_1|ARO_3000180|tetA(P)	0.4	0.131579	0	0
gb|YP_003283625_1|ARO_3000178|tet(K)	0	0.276316	0	0
gb|CDO61516_1|ARO_3003949|efrB	0.5	0.578947	0	0.142857
gb|BAA03776_1|ARO_3000316|mphA	0.3	0.0789474	0	0
gb|AAF17880_1|ARO_3002605|aadA5	0.3	0.0789474	0	0
gb|NP_863643_1|ARO_3002597|AAC(6_)-Ie-APH(2__)-Ia	0.8	0.526316	1	0.857143
gb|YP_001569085_1|ARO_3000621|PC1	0.7	0.407895	0	0.714286
gb|BAC11911_1|ARO_3003551|emeA	0.5	0.565789	0	0.142857
gb|AAD01867_1|ARO_3002875|dfrE	0.5	0.565789	0	0.142857
gb|CAQ03505_1|ARO_3001338|SHV-100	0.1	0.328947	0	0
gb|AJE60855_1|ARO_3003209|FosA5	0.1	0.328947	0	0
gb|YP_490321_1|ARO_3000828|baeR	0.2	0.381579	0	0
gb|NP_417544_5|ARO_3000024|patA	0.2	0.381579	0	0
gb|AAA22851_1|ARO_3000179|tet(L)	0.3	0.197368	0	0.571429
gb|ACC85616_1|ARO_3002804|FosA2	0	0.0657895	0	0.285714
gb|AAT46077_1|ARO_3000300|lsaA	0.5	0.552632	0	0.142857
gb|CDO61513_1|ARO_3003948|efrA	0.5	0.552632	0	0.142857
gb|YP_001693237_1|ARO_3003922|oqxA	0.1	0.315789	0	0
gb|AFK13827_1|ARO_3000825|robA	0	0.302632	0	0.428571
gb|YP_001245420_1|ARO_3000215|mecR1	0.4	0.473684	1	0.857143
gb|AIT76113_1|ARO_3002174|MIR-9	0	0.289474	0	0.428571
gb|YP_499945_1|ARO_3000839|arlS	0.1	0.276316	0	0.571429
gb|AFK13828_1|ARO_3000823|ramA	0	0.236842	0	0.428571
gb|YP_005228001_1|ARO_3003968|Klebsiella	0	0.223684	0	0
gb|BAJ09383_1|ARO_3003046|qacA	0.8	0.644737	1	1
gb|WP_002530866_1|ARO_3003974|Propionibacterium	0.6	0.342105	0	0.142857
gb|AAC75733_1|ARO_3000074|emrB	0.2	0.342105	0	0
gb|AAC75137_1|ARO_3000794|mdtC	0.2	0.342105	0	0
gb|CAP12359_2|ARO_3002452|OKP-B-19	0.1	0.289474	0	0
gb|WP_001025093|ARO_3003323|Staphylococcus	0.3	0.223684	0	0.571429
gb|YP_008997281_1|ARO_3002626|ANT(6)-Ia	0.3	0.105263	0	0
gb|CAJ67339_1|ARO_3000186|tetM	0.3	0.105263	0	0
gb|YP_489794_1|ARO_3000263|marA	0.3	0.578947	0	0.428571
gb|YP_491919_1|ARO_3000508|gadX	0.2	0.328947	0	0
gb|NP_311275_1|ARO_3000832|evgA	0.2	0.328947	0	0
gb|AAC75315_1|ARO_3002985|arnA	0.2	0.328947	0	0
gb|BAE78116_1|ARO_3003576|PmrC	0.2	0.328947	0	0
gb|AAC75429_1|ARO_3000833|evgS	0.2	0.328947	0	0
gb|AAC76297_1|ARO_3000499|acrE	0.2	0.328947	0	0
gb|YP_490697_1|ARO_3000491|acrD	0.2	0.328947	0	0
gb|ADJ67256|ARO_3003319|Staphylococcus	0.2	0.25	0	0.571429
gb|YP_040771_1|ARO_3003315|Staphylococcus	0.2	0.25	0	0.571429
gb|YP_500802_1|ARO_3003074|Staphylococcus	0.2	0.25	0	0.571429
gb|AMP35312_1|ARO_3002831|vgaC	0.1	0.394737	0	0.428571
gb|YP_489201_1|ARO_3003390|Escherichia	0.4	0.315789	0	0
gb|AGC51118_1|ARO_3000617|mecA	0.6	0.513158	1	0.857143
gb|AAC76298_1|ARO_3000502|acrF	0.3	0.342105	0	0
gb|NP_415372_1|ARO_3003751|Escherichia	0.2	0.315789	0	0
gb|NP_416292_1|ARO_3002818|msrB	0.2	0.315789	0	0
gb|NP_309766_1|ARO_3000676|H-NS	0.2	0.315789	0	0
gb|BAA11236_1|ARO_3000206|emrK	0.2	0.315789	0	0
gb|BAE78083_1|ARO_3003549|mdtO	0.2	0.315789	0	0
gb|AAC74149_2|ARO_3001216|mdtH	0.2	0.315789	0	0
gb|AAC75138_1|ARO_3001330|mdtD	0.2	0.315789	0	0
gb|AAC76539_1|ARO_3000796|mdtF	0.2	0.315789	0	0
gb|BAA11237_1|ARO_3000254|emrY	0.2	0.315789	0	0
gb|BAE77781_1|ARO_3000795|mdtE	0.2	0.315789	0	0
gb|AAC76733_1|ARO_3001215|mdtL	0.2	0.315789	0	0
gb|BAE78082_1|ARO_3003550|mdtP	0.2	0.315789	0	0
gb|NP_414995_1|ARO_3000216|acrB	0.2	0.315789	0	0
gb|AAC75136_1|ARO_3000793|mdtB	0.2	0.315789	0	0
gb|CDJ72593|ARO_3003889|Escherichia	0.2	0.315789	0	0
gb|YP_491362_1|ARO_3003386|Escherichia	0.2	0.315789	0	0
gb|AAC75135_2|ARO_3000792|mdtA	0.4	0.302632	0	0
gb|AGN33258_1|ARO_3002829|vgaA	0	0.184211	0	0
gb|AAF86219_1|ARO_3000375|ErmB	0.4	0.276316	0	0
gb|CAA63498_1|ARO_3002670|cat	0.2	0.0526316	0	0
gb|AFH35853_1|ARO_3001328|mdfA	0.3	0.328947	0	0
gb|AAC75314_1|ARO_3003578|PmrF	0.3	0.328947	0	0
gb|ACN32294_1|ARO_3000237|tolC	0.3	0.328947	0	0
gb|BAE78084_1|ARO_3003548|mdtN	0.3	0.328947	0	0
gb|BAA16547_1|ARO_3000027|emrA	0.3	0.328947	0	0
gb|NP_415611_1|ARO_3004049|antibiotic	0.2	0.460526	0	0.285714
gb|AAA98296_1|ARO_3000250|ErmC	0.6	0.565789	0	0.857143
gb|CAA77936_1|ARO_3004039|Escherichia	0.2	0.302632	0	0
gb|NP_414618_4|ARO_3003843|leuO	0.2	0.302632	0	0
gb|AAU95768_1|ARO_3000026|mepA	0.1	0.171053	0	0.428571
gb|NP_462096_1|ARO_3003317|Salmonella	0.3	0.552632	0	0.428571
gb|AAN82549_1|ARO_3003369|Escherichia	0.3	0.552632	0	0.428571
gb|NP_417969_1|ARO_3003834|gadE	0.3	0.315789	0	0
gb|NP_415632_1|ARO_3003844|mfd	0.3	0.315789	0	0
gb|NP_414997_1|ARO_3003807|Escherichia	0.3	0.315789	0	0
gb|NP_312864_1|ARO_3000830|cpxA	0.3	0.315789	0	0
gb|NP_415434_1|ARO_3003950|msbA	0.2	0.473684	0	0.428571
gb|YP_039997_1|ARO_3003291|Staphylococcus	0.4	0.276316	0	0.571429
gb|WP_041918279_1|ARO_3003925|Haemophilus	0.1	0.0131579	0	0
gb|NP_358469_1|ARO_3000822|pmrA	0	0.118421	0	0.285714
gb|AEL31272_1|ARO_3002756|QnrB41	0	0.118421	0	0.285714
gb|BAJ17544_1|ARO_3002069|CMY-59	0	0.118421	0	0.285714
gb|AAC76296_1|ARO_3000656|acrS	0.3	0.302632	0	0
gb|AAC74603_2|ARO_3003378|Escherichia	0.2	0.381579	0	0.142857
gb|AAS68233_1|ARO_3000391|norA	0.8	0.723684	1	1
gb|AAV80464_1|ARO_3000565|tet(38)	0.3	0.276316	0	0.571429
gb|EFF04178_1|ARO_3000309|emrD	0.2	0.434211	0	0.285714
gb|YP_039483_1|ARO_3003296|Staphylococcus	0.1	0.210526	0	0.428571
gb|AET10445_1|ARO_3004033|tetB(46)	0	0.144737	0	0
gb|YP_003281576_1|ARO_3000815|mgrA	0.7	0.736842	1	1
gb|NP_462089_1|ARO_3003939|Salmonella	0.2	0.368421	0	0.142857
gb|YP_039996_1|ARO_3003285|Staphylococcus_gb|YP_039996_1|ARO_3003287|Staphylococcus	0.1	0.223684	0	0.428571
gb|YP_001440920_1|ARO_3000746|mepR	0.3	0.289474	0	0.571429
gb|AIL15701|ARO_3003775|Escherichia	0.2	0.421053	0	0.285714
gb|YP_489321_1|ARO_3001329|mdtG	0.2	0.421053	0	0.285714
gb|ABG91835_1|ARO_3002860|dfrA17	0.2	0.0789474	0	0
gb|AAS13767_1|ARO_3003839|Mrx	0.2	0.0789474	0	0
gb|AAL59753_1|ARO_3000412|sul2	0.2	0.0789474	0	0
gb|AAL78275_1|ARO_3002391|OXY-1-3	0	0.184211	0	0.142857
gb|AAC77293_1|ARO_3001214|mdtM	0.2	0.236842	0	0
gb|NP_899170_1|ARO_3000599|Erm(33)	0.6	0.605263	1	0.857143
gb|AAC76093_1|ARO_3002986|bacA	0.2	0.342105	0	0.142857
gb|NP_359110_1|ARO_3003042|Streptococcus	0	0.0394737	0	0.142857
gb|YP_006938491_1|ARO_3003905|ANT(4_)-Ib	0.5	0.526316	0	0.714286
gb|YP_208874_1|ARO_3003930|rpsJ	0.2	0.0921053	0	0
gb|AAO04716_1|ARO_3002865|dfrC	0.7	0.631579	1	0.857143
gb|CAA67349_1|ARO_3003359|Streptomyces	0	0.105263	0	0
gb|AET10444_1|ARO_3004032|tetA(46)	0	0.105263	0	0
gb|AAB49832_1|ARO_3002636|APH(2__)-IIIa	0	0.105263	0	0
gb|YP_001332362_1|ARO_3000838|arlR	0.2	0.223684	0	0.428571
gb|WP_014065640_1|ARO_3003924|Haemophilus	0.1	0.0263158	0	0
gb|AET15272_1|ARO_3003197|aadA25	0	0.144737	0	0.142857
gb|AAC75089_1|ARO_3003577|PmrE	0.2	0.184211	0	0
gb|NP_358969_1|ARO_3000025|patB	0	0.0526316	0	0.142857
gb|AHA80960_1|ARO_3001388|TEM-211	0.2	0.118421	0	0
gb|AAC23556_1|ARO_3002660|APH(6)-Id	0.2	0.171053	0	0
gb|ANK04027_1|ARO_3003838|gadW	0.2	0.171053	0	0
gb|YP_039482_1|ARO_3003301|Staphylococcus	0.3	0.236842	0	0.428571
gb|NP_415222_1|ARO_3003841|kdpE	0.2	0.157895	0	0
gb|ABK33456_1|ARO_3002639|APH(3__)-Ib	0.2	0.131579	0	0
gb|AAA25655_1|ARO_3002670|cat	0	0.0789474	0	0
gb|AAD12753_1|ARO_3000177|tet(J)	0	0.0789474	0	0
gb|ACT97371_1|ARO_3003097|CfxA6	0	0.0657895	0	0
gb|NP_416715_1|ARO_3003952|YojI	0.3	0.394737	0	0.285714
gb|CAE51638_1|ARO_3002641|APH(3_)-Ia	0.1	0.118421	0	0
gb|AAA26613_1|ARO_3002670|cat	0	0.0526316	0	0
gb|AAA20117_1|ARO_3000195|tetB(P)	0	0.0526316	0	0
gb|AHV80711_1|ARO_3002863|dfrA8	0	0.0526316	0	0
gb|AEJ33969_1|ARO_3000410|sul1	0.3	0.210526	0	0.142857
gb|Q0SSM7|ARO_3003773|Clostridium	0.1	0.105263	0	0
gb|CCP46624_1|ARO_3003326|Mycobacterium_gb|AAK48268_1|ARO_3003465|Mycobacterium	0	0.0394737	0	0
gb|AAF86691_1|ARO_3001816|ACC-2	0	0.0394737	0	0
gb|YP_008997285_1|ARO_3000615|mefA	0	0.0394737	0	0
gb|ACA23185_1|ARO_3000194|tetW	0	0.0394737	0	0
gb|AAD01868_1|ARO_3002867|dfrF	0	0.0394737	0	0
gb|AAA88675_1|ARO_3000498|ErmF	0	0.0394737	0	0
gb|BAE77595_1|ARO_3003303|Escherichia	0.3	0.342105	0	0.285714
gb|YP_002743273_1|ARO_3000616|mel	0.3	0.328947	0	0.285714
gb|AEA37904_1|ARO_3003112|lsaC	0	0.0263158	0	0
gb|AAC36915_1|ARO_3000593|ErmQ	0	0.0263158	0	0
gb|ACT97415_1|ARO_3002999|CblA-1	0	0.0263158	0	0
gb|CAL44992_1|ARO_3002835|lnuA	0	0.0263158	0	0
gb|YP_001315192_1|ARO_3000347|ErmA	0	0.0263158	0	0
gb|CAA79727_1|ARO_3000191|tetQ	0	0.0263158	0	0
gb|AAA98096_1|ARO_3000595|ErmT	0	0.0131579	0	0
gb|AJF83452_1|ARO_3003574|LpxC	0	0.0131579	0	0
gb|AAA27471_1|ARO_3000205|tetX	0	0.0131579	0	0
gb|AAL08441_1|ARO_3002670|cat	0	0.0131579	0	0
gb|CAC19929_1|ARO_3002854|dfrA1	0	0.0131579	0	0
gb|BAD95494_1|ARO_3002895|SAT-1	0	0.0131579	0	0

## Sheet: X2
ARG ID (CARD)	Controls before transfer	Controls after transfer	X2 before transfer	X2 after transfer
gb|AAX14802_1|ARO_3000781|adeJ	0	0	0	0.5
gb|AAL78275_1|ARO_3002391|OXY-1-3	0.13253	1	0.714286	1
gb|YP_005228001_1|ARO_3003968|Klebsiella	0.192771	0.333333	1	0.666667
gb|AJF83452_1|ARO_3003574|LpxC	0.0120482	0	0	0.333333
gb|YP_001693237_1|ARO_3003922|oqxA	0.289157	0.333333	1	0.833333
gb|YP_005226137_1|ARO_3003966|Klebsiella	0.349398	1	1	0.833333
gb|AMP35312_1|ARO_3002831|vgaC	0.361446	0.333333	1	1
gb|ABR75897_1|ARO_3003373|Klebsiella	0.421687	1	1	1
gb|CAP12359_2|ARO_3002452|OKP-B-19	0.26506	0.333333	1	0.5
gb|CAC41008_1|ARO_3004041|Klebsiella	0.337349	0.333333	1	0.833333
gb|ABR76005_1|ARO_3003380|Klebsiella	0.337349	0.333333	1	0.833333
gb|CAQ03505_1|ARO_3001338|SHV-100	0.301205	0.333333	1	0.666667
gb|YP_001440920_1|ARO_3000746|mepR	0.289157	0.333333	0.857143	0.833333
gb|YP_001693238|ARO_3003923|oqxB	0.481928	1	1	1
gb|YP_039482_1|ARO_3003301|Staphylococcus	0.253012	0	0.857143	0.5
gb|BAJ09383_1|ARO_3003046|qacA	0.686747	0	0.714286	0.166667
gb|CDO13981_1|ARO_3003585|Klebsiella	0.554217	1	1	1
gb|NP_863643_1|ARO_3002597|AAC(6_)-Ie-APH(2__)-Ia	0.578313	0	0.428571	0
gb|AAN82549_1|ARO_3003369|Escherichia	0.506024	1	0.857143	1
gb|AAT46077_1|ARO_3000300|lsaA	0.554217	0.333333	1	1
gb|CDO61513_1|ARO_3003948|efrA	0.554217	0.333333	1	1
gb|YP_489321_1|ARO_3001329|mdtG	0.373494	1	0.142857	0
gb|AAB53445_1|ARO_3002897|SAT-4	0.409639	0.333333	1	0.666667
gb|BAC11911_1|ARO_3003551|emeA	0.566265	0.333333	1	1
gb|AAD01867_1|ARO_3002875|dfrE	0.566265	0.333333	1	1
gb|NP_415804_1|ARO_3004045|antibiotic	0.590361	1	1	1
gb|Q0SSM7|ARO_3003773|Clostridium	0.0963855	0.333333	0.285714	0.5
gb|CDO61516_1|ARO_3003949|efrB	0.578313	0.333333	1	1
gb|AGV10830_1|ARO_3002647|APH(3_)-IIIa	0.39759	0.333333	0.857143	0.833333
gb|NP_462096_1|ARO_3003317|Salmonella	0.506024	1	0.142857	0.166667
gb|NP_418486_1|ARO_3003511|Escherichia	0.566265	1	0.857143	1
gb|NP_462089_1|ARO_3003939|Salmonella	0.337349	0.666667	0	0
gb|YP_186749_1|ARO_3000489|sav1866	0.156627	0.333333	0.571429	0.333333
gb|NP_415434_1|ARO_3003950|msbA	0.421687	1	0.142857	0.166667
gb|NP_415611_1|ARO_3004049|antibiotic	0.409639	1	0.142857	0.666667
gb|EFF04178_1|ARO_3000309|emrD	0.385542	1	0.142857	0.166667
gb|AIL15701|ARO_3003775|Escherichia	0.373494	1	0.142857	0.166667
gb|YP_006938491_1|ARO_3003905|ANT(4_)-Ib	0.542169	0	0.142857	0.333333
gb|YP_001569085_1|ARO_3000621|PC1	0.445783	0.333333	0.857143	0.833333
gb|YP_489794_1|ARO_3000263|marA	0.53012	1	0.142857	0.333333
gb|AAU95768_1|ARO_3000026|mepA	0.168675	0	0.571429	0.166667
gb|CAA77936_1|ARO_3004039|Escherichia	0.277108	0.666667	0	0
gb|NP_414618_4|ARO_3003843|leuO	0.277108	0.666667	0	0
gb|YP_003281576_1|ARO_3000815|mgrA	0.746988	0.333333	1	1
gb|NP_312937_1|ARO_3003288|Escherichia	0.674699	1	1	1
gb|YP_490321_1|ARO_3000828|baeR	0.337349	1	0.142857	0.333333
gb|CDJ73208|ARO_3003890|Escherichia	0.686747	1	1	1
gb|AAC74603_2|ARO_3003378|Escherichia	0.337349	1	0.285714	0.166667
gb|NP_417544_5|ARO_3000024|patA	0.337349	1	0.428571	0.166667
gb|YP_001245420_1|ARO_3000215|mecR1	0.481928	0	0.714286	0.166667
gb|AAF86219_1|ARO_3000375|ErmB	0.301205	0	0	0
gb|NP_417169_1|ARO_3000516|emrR	0.698795	1	1	1
gb|NP_460903_1|ARO_3000826|sdiA	0.710843	1	1	1
gb|WP_002530866_1|ARO_3003974|Propionibacterium	0.361446	0.666667	0	0.166667
gb|YP_002743273_1|ARO_3000616|mel	0.325301	0.333333	0	0
gb|ABG77965_1|ARO_3004042|Enterobacter	0.722892	1	1	1
gb|BAE77933_1|ARO_3000518|CRP	0.722892	1	1	1
gb|AAC77293_1|ARO_3001214|mdtM	0.216867	0.666667	0.142857	0
gb|AAC76298_1|ARO_3000502|acrF	0.325301	0.666667	0.142857	0
gb|NP_415632_1|ARO_3003844|mfd	0.301205	0.666667	0	0.166667
gb|AFH35853_1|ARO_3001328|mdfA	0.313253	0.666667	0.142857	0
gb|AAC75733_1|ARO_3000074|emrB	0.313253	0.666667	0.142857	0
gb|BAE78084_1|ARO_3003548|mdtN	0.313253	0.666667	0.142857	0
gb|AAC75137_1|ARO_3000794|mdtC	0.313253	0.666667	0.142857	0
gb|NP_311275_1|ARO_3000832|evgA	0.301205	0.666667	0.142857	0
gb|AAC75135_2|ARO_3000792|mdtA	0.301205	0.666667	0.142857	0
gb|AAC76297_1|ARO_3000499|acrE	0.301205	0.666667	0.142857	0
gb|YP_490697_1|ARO_3000491|acrD	0.301205	0.666667	0.142857	0
gb|YP_001332362_1|ARO_3000838|arlR	0.228916	0	0.571429	0.166667
gb|NP_309766_1|ARO_3000676|H-NS	0.289157	0.666667	0.142857	0
gb|AAC76296_1|ARO_3000656|acrS	0.289157	0.666667	0.142857	0
gb|AAC74149_2|ARO_3001216|mdtH	0.289157	0.666667	0.142857	0
gb|AAC75138_1|ARO_3001330|mdtD	0.289157	0.666667	0.142857	0
gb|AAC76539_1|ARO_3000796|mdtF	0.289157	0.666667	0.142857	0
gb|BAE78082_1|ARO_3003550|mdtP	0.289157	0.666667	0.142857	0
gb|NP_414995_1|ARO_3000216|acrB	0.289157	0.666667	0.142857	0
gb|AAC75136_1|ARO_3000793|mdtB	0.289157	0.666667	0.142857	0
gb|CDJ72593|ARO_3003889|Escherichia	0.289157	0.666667	0.142857	0
gb|AJE60855_1|ARO_3003209|FosA5	0.313253	0	0.142857	0
gb|YP_499945_1|ARO_3000839|arlS	0.253012	0.333333	0.571429	0.5
gb|AAL12234_1|ARO_3003552|fusB	0.216867	0	0	0
gb|AAA22851_1|ARO_3000179|tet(L)	0.216867	0	0	0
gb|AAY32951_1|ARO_3002837|lnuC	0.0722892	0.333333	0	0
gb|AAA98296_1|ARO_3000250|ErmC	0.566265	0.666667	0.428571	0.166667
gb|YP_500802_1|ARO_3003074|Staphylococcus	0.240964	0.333333	0.571429	0.166667
gb|NP_899170_1|ARO_3000599|Erm(33)	0.590361	1	0.857143	0.666667
gb|AAO04716_1|ARO_3002865|dfrC	0.650602	0.333333	0.714286	0.333333
gb|YP_003283625_1|ARO_3000178|tet(K)	0.240964	0.333333	0.571429	0.333333
gb|ANK04027_1|ARO_3003838|gadW	0.180723	0	0	0
gb|BAE77595_1|ARO_3003303|Escherichia	0.325301	0.666667	0.142857	0.166667
gb|BAA15934_1|ARO_3000829|baeS	0.26506	0.666667	0.142857	0.166667
gb|YP_489201_1|ARO_3003390|Escherichia	0.313253	0.666667	0.142857	0.166667
gb|ACN32294_1|ARO_3000237|tolC	0.313253	0.666667	0.142857	0.166667
gb|BAA16547_1|ARO_3000027|emrA	0.313253	0.666667	0.142857	0.166667
gb|AAC76093_1|ARO_3002986|bacA	0.313253	0.666667	0.142857	0.166667
gb|YP_491919_1|ARO_3000508|gadX	0.301205	0.666667	0.142857	0.166667
gb|NP_417969_1|ARO_3003834|gadE	0.301205	0.666667	0.142857	0.166667
gb|AAC75315_1|ARO_3002985|arnA	0.301205	0.666667	0.142857	0.166667
gb|BAE78116_1|ARO_3003576|PmrC	0.301205	0.666667	0.142857	0.166667
gb|NP_414997_1|ARO_3003807|Escherichia	0.301205	0.666667	0.142857	0.166667
gb|AAC75429_1|ARO_3000833|evgS	0.301205	0.666667	0.142857	0.166667
gb|NP_312864_1|ARO_3000830|cpxA	0.301205	0.666667	0.142857	0.166667
gb|NP_415372_1|ARO_3003751|Escherichia	0.289157	0.666667	0.142857	0.166667
gb|NP_416292_1|ARO_3002818|msrB	0.289157	0.666667	0.142857	0.166667
gb|BAA11236_1|ARO_3000206|emrK	0.289157	0.666667	0.142857	0.166667
gb|BAE78083_1|ARO_3003549|mdtO	0.289157	0.666667	0.142857	0.166667
gb|BAA11237_1|ARO_3000254|emrY	0.289157	0.666667	0.142857	0.166667
gb|BAE77781_1|ARO_3000795|mdtE	0.289157	0.666667	0.142857	0.166667
gb|AAC76733_1|ARO_3001215|mdtL	0.289157	0.666667	0.142857	0.166667
gb|YP_491362_1|ARO_3003386|Escherichia	0.289157	0.666667	0.142857	0.166667
gb|AGN33258_1|ARO_3002829|vgaA	0.168675	0	0	0
gb|AAD01868_1|ARO_3002867|dfrF	0.0361446	0	0	0.166667
gb|AFK13827_1|ARO_3000825|robA	0.26506	0.333333	0	0.166667
gb|AEJ33969_1|ARO_3000410|sul1	0.228916	0	0.285714	0
gb|NP_416715_1|ARO_3003952|YojI	0.373494	0.666667	0.142857	0.333333
gb|AAV80464_1|ARO_3000565|tet(38)	0.277108	0.333333	0.571429	0.333333
gb|AIT76113_1|ARO_3002174|MIR-9	0.253012	0.333333	0	0.166667
gb|ABK33456_1|ARO_3002639|APH(3__)-Ib	0.144578	0	0	0
gb|AAA20116_1|ARO_3000180|tetA(P)	0.156627	0.333333	0.285714	0
gb|AAC77033_1|ARO_3003381|Escherichia	0.542169	1	0.571429	0.5
gb|YP_039483_1|ARO_3003296|Staphylococcus	0.192771	0.333333	0.428571	0.166667
gb|YP_039997_1|ARO_3003291|Staphylococcus	0.289157	0.333333	0.571429	0.333333
gb|AET10445_1|ARO_3004033|tetB(46)	0.13253	0	0	0
gb|AAA23033_1|ARO_3000190|tetO	0.13253	0	0	0
gb|YP_008997281_1|ARO_3002626|ANT(6)-Ia	0.13253	0	0	0
gb|CAJ67339_1|ARO_3000186|tetM	0.13253	0	0	0
gb|AHA80960_1|ARO_3001388|TEM-211	0.13253	0	0	0
gb|BAE15963_1|ARO_3002868|dfrG	0.204819	0	0.142857	0
gb|AAC75314_1|ARO_3003578|PmrF	0.313253	0.666667	0.285714	0.166667
gb|YP_039996_1|ARO_3003285|Staphylococcus_gb|YP_039996_1|ARO_3003287|Staphylococcus	0.204819	0.333333	0.428571	0.166667
gb|AAC75089_1|ARO_3003577|PmrE	0.192771	0	0.142857	0
gb|AFK13828_1|ARO_3000823|ramA	0.204819	0.333333	0	0.166667
gb|AAC23556_1|ARO_3002660|APH(6)-Id	0.180723	0	0	0.166667
gb|NP_358469_1|ARO_3000822|pmrA	0.108434	0	0	0
gb|AEL31272_1|ARO_3002756|QnrB41	0.108434	0	0	0
gb|BAA03776_1|ARO_3000316|mphA	0.108434	0	0	0
gb|AAF17880_1|ARO_3002605|aadA5	0.108434	0	0	0
gb|NP_415222_1|ARO_3003841|kdpE	0.168675	0	0.142857	0
gb|AET15272_1|ARO_3003197|aadA25	0.13253	0	0.285714	0.166667
gb|CAA67349_1|ARO_3003359|Streptomyces	0.0963855	0	0	0
gb|AET10444_1|ARO_3004032|tetA(46)	0.0963855	0	0	0
gb|AAB49832_1|ARO_3002636|APH(2__)-IIIa	0.0963855	0	0	0
gb|ABG91835_1|ARO_3002860|dfrA17	0.0963855	0	0	0
gb|AAS13767_1|ARO_3003839|Mrx	0.0963855	0	0	0
gb|AAL59753_1|ARO_3000412|sul2	0.0963855	0	0	0
gb|AAS68233_1|ARO_3000391|norA	0.73494	0.666667	0.714286	0.5
gb|ADJ67256|ARO_3003319|Staphylococcus	0.240964	0.333333	0.428571	0.166667
gb|YP_040771_1|ARO_3003315|Staphylococcus	0.240964	0.333333	0.428571	0.166667
gb|CAE51638_1|ARO_3002641|APH(3_)-Ia	0.120482	0	0	0.166667
gb|YP_208874_1|ARO_3003930|rpsJ	0.108434	0	0	0.166667
gb|NP_461214_1|ARO_3003926|Salmonella	0.457831	0.666667	0.571429	0.333333
gb|AAA25655_1|ARO_3002670|cat	0.0722892	0	0	0
gb|CAE00499_1|ARO_3003835|cdeA	0.0722892	0	0	0
gb|CAA63498_1|ARO_3002670|cat	0.0722892	0	0	0
gb|AAD12753_1|ARO_3000177|tet(J)	0.0722892	0	0	0
gb|YP_001086469_1|ARO_3003995|Clostridium	0.0722892	0	0	0
gb|WP_009887863_1|ARO_3003357|Clostridium	0.0722892	0	0	0
gb|NP_373280_1|ARO_3000124|mecI	0.240964	0	0.285714	0.166667
gb|BAJ17544_1|ARO_3002069|CMY-59	0.108434	0	0.142857	0
gb|ACC85616_1|ARO_3002804|FosA2	0.060241	0	0	0
gb|AAK01167_1|ARO_3002819|msrC	0.060241	0	0	0
gb|ALL09868|ARO_3003092|Enterococcus	0.060241	0	0	0
gb|AFK58561_1|ARO_3003079|Enterococcus	0.060241	0	0	0
gb|AFK58562_1|ARO_3003078|Enterococcus	0.060241	0	0	0
gb|YP_006374661_1|ARO_3003438|Enterococcus	0.060241	0	0	0
gb|AAB63533_1|ARO_3002556|AAC(6_)-Ii	0.060241	0	0	0
gb|ACT97371_1|ARO_3003097|CfxA6	0.060241	0	0	0
gb|AAG03357_1|ARO_3000596|ErmX	0.277108	0.333333	0.142857	0.166667
gb|NP_358969_1|ARO_3000025|patB	0.0481928	0	0	0
gb|AAA26613_1|ARO_3002670|cat	0.0481928	0	0	0
gb|AAA20117_1|ARO_3000195|tetB(P)	0.0481928	0	0	0
gb|AHV80711_1|ARO_3002863|dfrA8	0.0481928	0	0	0
gb|CCP46624_1|ARO_3003326|Mycobacterium_gb|AAK48268_1|ARO_3003465|Mycobacterium	0.0361446	0	0	0
gb|NP_359110_1|ARO_3003042|Streptococcus	0.0361446	0	0	0
gb|AAF86691_1|ARO_3001816|ACC-2	0.0361446	0	0	0
gb|YP_008997285_1|ARO_3000615|mefA	0.0361446	0	0	0
gb|ACA23185_1|ARO_3000194|tetW	0.0361446	0	0	0
gb|WP_014065640_1|ARO_3003924|Haemophilus	0.0361446	0	0	0
gb|AAA88675_1|ARO_3000498|ErmF	0.0361446	0	0	0
gb|CAA38525_1|ARO_3002535|AAC(3)-IIc	0.0361446	0	0	0
gb|AEM44648_1|ARO_3001970|CTX-M-110	0.0361446	0	0	0
gb|AGC51118_1|ARO_3000617|mecA	0.53012	0.333333	0.571429	0.5
gb|WP_001025093|ARO_3003323|Staphylococcus	0.228916	0.333333	0.285714	0.166667
gb|AEA37904_1|ARO_3003112|lsaC	0.0240964	0	0	0
gb|AAC36915_1|ARO_3000593|ErmQ	0.0240964	0	0	0
gb|ACT97415_1|ARO_3002999|CblA-1	0.0240964	0	0	0
gb|CAL44992_1|ARO_3002835|lnuA	0.0240964	0	0	0
gb|YP_001315192_1|ARO_3000347|ErmA	0.0240964	0	0	0
gb|WP_041918279_1|ARO_3003925|Haemophilus	0.0240964	0	0	0
gb|CAA79727_1|ARO_3000191|tetQ	0.0240964	0	0	0
gb|AAU10334_1|ARO_3002628|aad(6)	0.349398	0.333333	0.428571	0.333333
gb|AAF01499_1|ARO_3000193|tetT	0.0120482	0	0	0
gb|AAA98096_1|ARO_3000595|ErmT	0.0120482	0	0	0
gb|AAA27471_1|ARO_3000205|tetX	0.0120482	0	0	0
gb|AAL08441_1|ARO_3002670|cat	0.0120482	0	0	0
gb|CAC19929_1|ARO_3002854|dfrA1	0.0120482	0	0	0
gb|BAD95494_1|ARO_3002895|SAT-1	0.0120482	0	0	0

## Sheet: X3
ARG ID (CARD)	Controls before transfer	Controls after transfer	X3 before transfer	X3 after transfer
gb|AAL78275_1|ARO_3002391|OXY-1-3	0.13253	1	0.625	1
gb|YP_005228001_1|ARO_3003968|Klebsiella	0.192771	0.333333	1	0.4
gb|AAX14802_1|ARO_3000781|adeJ	0	0	0	0.2
gb|AMP35312_1|ARO_3002831|vgaC	0.361446	0.333333	1	1
gb|CAP12359_2|ARO_3002452|OKP-B-19	0.26506	0.333333	1	0.2
gb|ABR75897_1|ARO_3003373|Klebsiella	0.421687	1	1	1
gb|YP_005226137_1|ARO_3003966|Klebsiella	0.349398	1	1	0.6
gb|YP_001693237_1|ARO_3003922|oqxA	0.289157	0.333333	1	0.4
gb|CAQ03505_1|ARO_3001338|SHV-100	0.301205	0.333333	1	0.4
gb|YP_001693238|ARO_3003923|oqxB	0.481928	1	1	1
gb|CAC41008_1|ARO_3004041|Klebsiella	0.337349	0.333333	1	0.6
gb|ABR76005_1|ARO_3003380|Klebsiella	0.337349	0.333333	1	0.6
gb|NP_415434_1|ARO_3003950|msbA	0.421687	1	0	0
gb|YP_006938491_1|ARO_3003905|ANT(4_)-Ib	0.542169	0	0	0.2
gb|AIL15701|ARO_3003775|Escherichia	0.373494	1	0	0
gb|YP_490321_1|ARO_3000828|baeR	0.337349	1	0	0
gb|NP_462096_1|ARO_3003317|Salmonella	0.506024	1	0	0.2
gb|CDO13981_1|ARO_3003585|Klebsiella	0.554217	1	1	1
gb|EFF04178_1|ARO_3000309|emrD	0.385542	1	0	0.2
gb|YP_489321_1|ARO_3001329|mdtG	0.373494	1	0	0.2
gb|AAT46077_1|ARO_3000300|lsaA	0.554217	0.333333	1	1
gb|AAC74603_2|ARO_3003378|Escherichia	0.337349	1	0.125	0
gb|BAC11911_1|ARO_3003551|emeA	0.566265	0.333333	1	1
gb|AAD01867_1|ARO_3002875|dfrE	0.566265	0.333333	1	1
gb|AAV80464_1|ARO_3000565|tet(38)	0.277108	0.333333	0	0.8
gb|CDO61516_1|ARO_3003949|efrB	0.578313	0.333333	1	1
gb|YP_039997_1|ARO_3003291|Staphylococcus	0.289157	0.333333	0	0.8
gb|YP_001569085_1|ARO_3000621|PC1	0.445783	0.333333	0	0.8
gb|YP_186749_1|ARO_3000489|sav1866	0.156627	0.333333	0	0.6
gb|AAB53445_1|ARO_3002897|SAT-4	0.409639	0.333333	0	0.8
gb|NP_417544_5|ARO_3000024|patA	0.337349	1	0.25	0
gb|AJF83452_1|ARO_3003574|LpxC	0.0120482	0	0	0.2
gb|AAC77033_1|ARO_3003381|Escherichia	0.542169	1	0.625	0
gb|NP_418486_1|ARO_3003511|Escherichia	0.566265	1	0.875	1
gb|NP_462089_1|ARO_3003939|Salmonella	0.337349	0.666667	0	0
gb|YP_489794_1|ARO_3000263|marA	0.53012	1	0.125	0.4
gb|AAC76298_1|ARO_3000502|acrF	0.325301	0.666667	0	0
gb|BAE77595_1|ARO_3003303|Escherichia	0.325301	0.666667	0	0
gb|YP_489201_1|ARO_3003390|Escherichia	0.313253	0.666667	0	0
gb|AFH35853_1|ARO_3001328|mdfA	0.313253	0.666667	0	0
gb|AAC75314_1|ARO_3003578|PmrF	0.313253	0.666667	0	0
gb|ACN32294_1|ARO_3000237|tolC	0.313253	0.666667	0	0
gb|AAC75733_1|ARO_3000074|emrB	0.313253	0.666667	0	0
gb|BAE78084_1|ARO_3003548|mdtN	0.313253	0.666667	0	0
gb|BAA16547_1|ARO_3000027|emrA	0.313253	0.666667	0	0
gb|AAC75137_1|ARO_3000794|mdtC	0.313253	0.666667	0	0
gb|AAC76093_1|ARO_3002986|bacA	0.313253	0.666667	0	0
gb|YP_491919_1|ARO_3000508|gadX	0.301205	0.666667	0	0
gb|NP_417969_1|ARO_3003834|gadE	0.301205	0.666667	0	0
gb|NP_311275_1|ARO_3000832|evgA	0.301205	0.666667	0	0
gb|AAC75315_1|ARO_3002985|arnA	0.301205	0.666667	0	0
gb|NP_415632_1|ARO_3003844|mfd	0.301205	0.666667	0	0
gb|BAE78116_1|ARO_3003576|PmrC	0.301205	0.666667	0	0
gb|AAC75135_2|ARO_3000792|mdtA	0.301205	0.666667	0	0
gb|NP_414997_1|ARO_3003807|Escherichia	0.301205	0.666667	0	0
gb|AAC75429_1|ARO_3000833|evgS	0.301205	0.666667	0	0
gb|NP_312864_1|ARO_3000830|cpxA	0.301205	0.666667	0	0
gb|AAC76297_1|ARO_3000499|acrE	0.301205	0.666667	0	0
gb|YP_490697_1|ARO_3000491|acrD	0.301205	0.666667	0	0
gb|NP_415372_1|ARO_3003751|Escherichia	0.289157	0.666667	0	0
gb|NP_416292_1|ARO_3002818|msrB	0.289157	0.666667	0	0
gb|NP_309766_1|ARO_3000676|H-NS	0.289157	0.666667	0	0
gb|BAA11236_1|ARO_3000206|emrK	0.289157	0.666667	0	0
gb|BAE78083_1|ARO_3003549|mdtO	0.289157	0.666667	0	0
gb|AAC76296_1|ARO_3000656|acrS	0.289157	0.666667	0	0
gb|AAC74149_2|ARO_3001216|mdtH	0.289157	0.666667	0	0
gb|AAC75138_1|ARO_3001330|mdtD	0.289157	0.666667	0	0
gb|AAC76539_1|ARO_3000796|mdtF	0.289157	0.666667	0	0
gb|BAA11237_1|ARO_3000254|emrY	0.289157	0.666667	0	0
gb|BAE77781_1|ARO_3000795|mdtE	0.289157	0.666667	0	0
gb|AAC76733_1|ARO_3001215|mdtL	0.289157	0.666667	0	0
gb|BAE78082_1|ARO_3003550|mdtP	0.289157	0.666667	0	0
gb|NP_414995_1|ARO_3000216|acrB	0.289157	0.666667	0	0
gb|AAC75136_1|ARO_3000793|mdtB	0.289157	0.666667	0	0
gb|CDJ72593|ARO_3003889|Escherichia	0.289157	0.666667	0	0
gb|YP_491362_1|ARO_3003386|Escherichia	0.289157	0.666667	0	0
gb|CDO61513_1|ARO_3003948|efrA	0.554217	0.333333	0.875	1
gb|AAC77293_1|ARO_3001214|mdtM	0.216867	0.666667	0	0
gb|BAJ09383_1|ARO_3003046|qacA	0.686747	0	0.5	0.8
gb|CAA77936_1|ARO_3004039|Escherichia	0.277108	0.666667	0	0
gb|NP_414618_4|ARO_3003843|leuO	0.277108	0.666667	0	0
gb|AAN82549_1|ARO_3003369|Escherichia	0.506024	1	0.625	1
gb|BAA15934_1|ARO_3000829|baeS	0.26506	0.666667	0	0
gb|NP_312937_1|ARO_3003288|Escherichia	0.674699	1	1	1
gb|YP_001440920_1|ARO_3000746|mepR	0.289157	0.333333	0.125	0.8
gb|YP_039996_1|ARO_3003285|Staphylococcus_gb|YP_039996_1|ARO_3003287|Staphylococcus	0.204819	0.333333	0	0.6
gb|Q0SSM7|ARO_3003773|Clostridium	0.0963855	0.333333	0	0.4
gb|CDJ73208|ARO_3003890|Escherichia	0.686747	1	1	1
gb|YP_003281576_1|ARO_3000815|mgrA	0.746988	0.333333	0.5	1
gb|NP_417169_1|ARO_3000516|emrR	0.698795	1	1	1
gb|NP_416715_1|ARO_3003952|YojI	0.373494	0.666667	0	0.2
gb|WP_002530866_1|ARO_3003974|Propionibacterium	0.361446	0.666667	0	0.2
gb|NP_460903_1|ARO_3000826|sdiA	0.710843	1	1	1
gb|NP_415611_1|ARO_3004049|antibiotic	0.409639	1	0.25	0.2
gb|AGV10830_1|ARO_3002647|APH(3_)-IIIa	0.39759	0.333333	0.125	0.8
gb|YP_002743273_1|ARO_3000616|mel	0.325301	0.333333	0	0
gb|ABG77965_1|ARO_3004042|Enterobacter	0.722892	1	1	1
gb|BAE77933_1|ARO_3000518|CRP	0.722892	1	1	1
gb|AAU10334_1|ARO_3002628|aad(6)	0.349398	0.333333	0	0.6
gb|NP_415804_1|ARO_3004045|antibiotic	0.590361	1	0.625	1
gb|NP_899170_1|ARO_3000599|Erm(33)	0.590361	1	0.625	1
gb|NP_863643_1|ARO_3002597|AAC(6_)-Ie-APH(2__)-Ia	0.578313	0	0.375	0.6
gb|AAF86219_1|ARO_3000375|ErmB	0.301205	0	0	0.2
gb|AFK13827_1|ARO_3000825|robA	0.26506	0.333333	0	0
gb|AEJ33969_1|ARO_3000410|sul1	0.228916	0	0	0
gb|AIT76113_1|ARO_3002174|MIR-9	0.253012	0.333333	0	0
gb|YP_039482_1|ARO_3003301|Staphylococcus	0.253012	0	0	0.4
gb|AAU95768_1|ARO_3000026|mepA	0.168675	0	0	0.4
gb|AAL12234_1|ARO_3003552|fusB	0.216867	0	0	0
gb|AAA22851_1|ARO_3000179|tet(L)	0.216867	0	0	0
gb|YP_001332362_1|ARO_3000838|arlR	0.228916	0	0	0.4
gb|AAY32951_1|ARO_3002837|lnuC	0.0722892	0.333333	0	0
gb|AAO04716_1|ARO_3002865|dfrC	0.650602	0.333333	0.375	0.8
gb|AAA98296_1|ARO_3000250|ErmC	0.566265	0.666667	0.5	1
gb|BAE15963_1|ARO_3002868|dfrG	0.204819	0	0	0
gb|YP_039483_1|ARO_3003296|Staphylococcus	0.192771	0.333333	0	0.4
gb|AAC75089_1|ARO_3003577|PmrE	0.192771	0	0	0
gb|AFK13828_1|ARO_3000823|ramA	0.204819	0.333333	0	0
gb|ADJ67256|ARO_3003319|Staphylococcus	0.240964	0.333333	0	0.4
gb|YP_040771_1|ARO_3003315|Staphylococcus	0.240964	0.333333	0	0.4
gb|YP_500802_1|ARO_3003074|Staphylococcus	0.240964	0.333333	0	0.4
gb|ANK04027_1|ARO_3003838|gadW	0.180723	0	0	0
gb|YP_003283625_1|ARO_3000178|tet(K)	0.240964	0.333333	0.25	0.6
gb|AAA20116_1|ARO_3000180|tetA(P)	0.156627	0.333333	0	0
gb|AGN33258_1|ARO_3002829|vgaA	0.168675	0	0	0
gb|NP_415222_1|ARO_3003841|kdpE	0.168675	0	0	0
gb|NP_461214_1|ARO_3003926|Salmonella	0.457831	0.666667	0.75	0.6
gb|YP_001245420_1|ARO_3000215|mecR1	0.481928	0	0.5	0.6
gb|WP_001025093|ARO_3003323|Staphylococcus	0.228916	0.333333	0	0.2
gb|NP_373280_1|ARO_3000124|mecI	0.240964	0	0.25	0
gb|AET10445_1|ARO_3004033|tetB(46)	0.13253	0	0	0
gb|AAA23033_1|ARO_3000190|tetO	0.13253	0	0	0
gb|YP_008997281_1|ARO_3002626|ANT(6)-Ia	0.13253	0	0	0
gb|CAJ67339_1|ARO_3000186|tetM	0.13253	0	0	0
gb|AET15272_1|ARO_3003197|aadA25	0.13253	0	0	0
gb|AHA80960_1|ARO_3001388|TEM-211	0.13253	0	0	0
gb|AAS68233_1|ARO_3000391|norA	0.73494	0.666667	0.5	0.8
gb|AAG03357_1|ARO_3000596|ErmX	0.277108	0.333333	0.25	0
gb|YP_208874_1|ARO_3003930|rpsJ	0.108434	0	0	0
gb|BAA03776_1|ARO_3000316|mphA	0.108434	0	0	0
gb|AAF17880_1|ARO_3002605|aadA5	0.108434	0	0	0
gb|CCP46624_1|ARO_3003326|Mycobacterium_gb|AAK48268_1|ARO_3003465|Mycobacterium	0.0361446	0	0.125	0
gb|NP_358469_1|ARO_3000822|pmrA	0.108434	0	0	0.2
gb|AEL31272_1|ARO_3002756|QnrB41	0.108434	0	0	0.2
gb|BAJ17544_1|ARO_3002069|CMY-59	0.108434	0	0	0.2
gb|AJE60855_1|ARO_3003209|FosA5	0.313253	0	0.25	0.2
gb|AET10444_1|ARO_3004032|tetA(46)	0.0963855	0	0	0
gb|AAB49832_1|ARO_3002636|APH(2__)-IIIa	0.0963855	0	0	0
gb|ABG91835_1|ARO_3002860|dfrA17	0.0963855	0	0	0
gb|AAS13767_1|ARO_3003839|Mrx	0.0963855	0	0	0
gb|AAL59753_1|ARO_3000412|sul2	0.0963855	0	0	0
gb|YP_499945_1|ARO_3000839|arlS	0.253012	0.333333	0.125	0.4
gb|ABK33456_1|ARO_3002639|APH(3__)-Ib	0.144578	0	0.125	0
gb|AAA25655_1|ARO_3002670|cat	0.0722892	0	0	0
gb|CAE00499_1|ARO_3003835|cdeA	0.0722892	0	0	0
gb|CAA63498_1|ARO_3002670|cat	0.0722892	0	0	0
gb|AAD12753_1|ARO_3000177|tet(J)	0.0722892	0	0	0
gb|YP_001086469_1|ARO_3003995|Clostridium	0.0722892	0	0	0
gb|WP_009887863_1|ARO_3003357|Clostridium	0.0722892	0	0	0
gb|CAE51638_1|ARO_3002641|APH(3_)-Ia	0.120482	0	0.125	0
gb|ACC85616_1|ARO_3002804|FosA2	0.060241	0	0	0
gb|AAK01167_1|ARO_3002819|msrC	0.060241	0	0	0
gb|ALL09868|ARO_3003092|Enterococcus	0.060241	0	0	0
gb|AFK58561_1|ARO_3003079|Enterococcus	0.060241	0	0	0
gb|AFK58562_1|ARO_3003078|Enterococcus	0.060241	0	0	0
gb|YP_006374661_1|ARO_3003438|Enterococcus	0.060241	0	0	0
gb|AAB63533_1|ARO_3002556|AAC(6_)-Ii	0.060241	0	0	0
gb|ACT97371_1|ARO_3003097|CfxA6	0.060241	0	0	0
gb|CAA67349_1|ARO_3003359|Streptomyces	0.0963855	0	0.125	0
gb|AAC23556_1|ARO_3002660|APH(6)-Id	0.180723	0	0.25	0.2
gb|AGC51118_1|ARO_3000617|mecA	0.53012	0.333333	0.625	0.6
gb|NP_358969_1|ARO_3000025|patB	0.0481928	0	0	0
gb|AAA26613_1|ARO_3002670|cat	0.0481928	0	0	0
gb|AAA20117_1|ARO_3000195|tetB(P)	0.0481928	0	0	0
gb|AHV80711_1|ARO_3002863|dfrA8	0.0481928	0	0	0
gb|NP_359110_1|ARO_3003042|Streptococcus	0.0361446	0	0	0
gb|AAF86691_1|ARO_3001816|ACC-2	0.0361446	0	0	0
gb|YP_008997285_1|ARO_3000615|mefA	0.0361446	0	0	0
gb|ACA23185_1|ARO_3000194|tetW	0.0361446	0	0	0
gb|AAD01868_1|ARO_3002867|dfrF	0.0361446	0	0	0
gb|WP_014065640_1|ARO_3003924|Haemophilus	0.0361446	0	0	0
gb|AAA88675_1|ARO_3000498|ErmF	0.0361446	0	0	0
gb|CAA38525_1|ARO_3002535|AAC(3)-IIc	0.0361446	0	0	0
gb|AEM44648_1|ARO_3001970|CTX-M-110	0.0361446	0	0	0
gb|AEA37904_1|ARO_3003112|lsaC	0.0240964	0	0	0
gb|AAC36915_1|ARO_3000593|ErmQ	0.0240964	0	0	0
gb|ACT97415_1|ARO_3002999|CblA-1	0.0240964	0	0	0
gb|CAL44992_1|ARO_3002835|lnuA	0.0240964	0	0	0
gb|YP_001315192_1|ARO_3000347|ErmA	0.0240964	0	0	0
gb|WP_041918279_1|ARO_3003925|Haemophilus	0.0240964	0	0	0
gb|CAA79727_1|ARO_3000191|tetQ	0.0240964	0	0	0
gb|AAF01499_1|ARO_3000193|tetT	0.0120482	0	0	0
gb|AAA98096_1|ARO_3000595|ErmT	0.0120482	0	0	0
gb|AAA27471_1|ARO_3000205|tetX	0.0120482	0	0	0
gb|AAL08441_1|ARO_3002670|cat	0.0120482	0	0	0
gb|CAC19929_1|ARO_3002854|dfrA1	0.0120482	0	0	0
gb|BAD95494_1|ARO_3002895|SAT-1	0.0120482	0	0	0

## Sheet: X5
ARG ID (CARD)	Controls before transfer	Controls after transfer	X5 before transfer	X5 after transfer
gb|AAA23033_1|ARO_3000190|tetO	0.141026	0	1	1
gb|AAA20117_1|ARO_3000195|tetB(P)	0.0512821	0	0.5	1
gb|BAJ17544_1|ARO_3002069|CMY-59	0.115385	0	0.833333	1
gb|YP_005228001_1|ARO_3003968|Klebsiella	0.205128	0.125	1	1
gb|AAA98096_1|ARO_3000595|ErmT	0.0128205	0	0	0.5
gb|AJE60855_1|ARO_3003209|FosA5	0.333333	0	1	1
gb|Q0SSM7|ARO_3003773|Clostridium	0.102564	0.125	0.5	1
gb|CAP12359_2|ARO_3002452|OKP-B-19	0.282051	0.125	1	1
gb|AEL31272_1|ARO_3002756|QnrB41	0.115385	0	0.666667	0.5
gb|CAQ03505_1|ARO_3001338|SHV-100	0.320513	0.125	1	1
gb|AAC77293_1|ARO_3001214|mdtM	0.179487	0.75	0	0
gb|AAL78275_1|ARO_3002391|OXY-1-3	0.115385	0.625	0	0
gb|AAN82549_1|ARO_3003369|Escherichia	0.474359	1	0	0
gb|AIL15701|ARO_3003775|Escherichia	0.346154	0.875	0.833333	1
gb|BAE15963_1|ARO_3002868|dfrG	0.217949	0	0.833333	0
gb|YP_490321_1|ARO_3000828|baeR	0.307692	0.875	0	0
gb|AAC74603_2|ARO_3003378|Escherichia	0.307692	0.875	0	0.5
gb|CAC41008_1|ARO_3004041|Klebsiella	0.346154	0.25	1	1
gb|ABR76005_1|ARO_3003380|Klebsiella	0.346154	0.25	1	1
gb|AAF86691_1|ARO_3001816|ACC-2	0.0128205	0.25	0	0
gb|BAA15934_1|ARO_3000829|baeS	0.230769	0.75	0	0
gb|NP_415611_1|ARO_3004049|antibiotic	0.384615	0.875	0.833333	1
gb|NP_415434_1|ARO_3003950|msbA	0.397436	0.875	0	0
gb|YP_489321_1|ARO_3001329|mdtG	0.346154	0.875	0.666667	1
gb|CAA77936_1|ARO_3004039|Escherichia	0.24359	0.75	0	0
gb|NP_414618_4|ARO_3003843|leuO	0.24359	0.75	0	0
gb|YP_005226137_1|ARO_3003966|Klebsiella	0.358974	0.5	1	1
gb|AMP35312_1|ARO_3002831|vgaC	0.358974	0.375	1	1
gb|NP_415372_1|ARO_3003751|Escherichia	0.25641	0.75	0	0
gb|NP_416292_1|ARO_3002818|msrB	0.25641	0.75	0	0
gb|NP_309766_1|ARO_3000676|H-NS	0.25641	0.75	0	0
gb|BAA11236_1|ARO_3000206|emrK	0.25641	0.75	0	0
gb|BAE78083_1|ARO_3003549|mdtO	0.25641	0.75	0	0
gb|AAC76296_1|ARO_3000656|acrS	0.25641	0.75	0	0
gb|AAC74149_2|ARO_3001216|mdtH	0.25641	0.75	0	0
gb|AAC75138_1|ARO_3001330|mdtD	0.25641	0.75	0	0
gb|AAC76539_1|ARO_3000796|mdtF	0.25641	0.75	0	0
gb|BAA11237_1|ARO_3000254|emrY	0.25641	0.75	0	0
gb|BAE77781_1|ARO_3000795|mdtE	0.25641	0.75	0	0
gb|AAC76733_1|ARO_3001215|mdtL	0.25641	0.75	0	0
gb|BAE78082_1|ARO_3003550|mdtP	0.25641	0.75	0	0
gb|NP_414995_1|ARO_3000216|acrB	0.25641	0.75	0	0
gb|AAC75136_1|ARO_3000793|mdtB	0.25641	0.75	0	0
gb|CDJ72593|ARO_3003889|Escherichia	0.25641	0.75	0	0
gb|YP_491362_1|ARO_3003386|Escherichia	0.25641	0.75	0	0
gb|AAA20116_1|ARO_3000180|tetA(P)	0.166667	0.125	0.5	1
gb|EFF04178_1|ARO_3000309|emrD	0.358974	0.875	0.666667	1
gb|NP_462096_1|ARO_3003317|Salmonella	0.474359	1	0.833333	1
gb|YP_491919_1|ARO_3000508|gadX	0.269231	0.75	0	0
gb|NP_417969_1|ARO_3003834|gadE	0.269231	0.75	0	0
gb|NP_311275_1|ARO_3000832|evgA	0.269231	0.75	0	0
gb|AAC75315_1|ARO_3002985|arnA	0.269231	0.75	0	0
gb|NP_415632_1|ARO_3003844|mfd	0.269231	0.75	0	0
gb|BAE78116_1|ARO_3003576|PmrC	0.269231	0.75	0	0
gb|AAC75135_2|ARO_3000792|mdtA	0.269231	0.75	0	0
gb|NP_414997_1|ARO_3003807|Escherichia	0.269231	0.75	0	0
gb|AAC75429_1|ARO_3000833|evgS	0.269231	0.75	0	0
gb|NP_312864_1|ARO_3000830|cpxA	0.269231	0.75	0	0
gb|AAC76297_1|ARO_3000499|acrE	0.269231	0.75	0	0
gb|YP_490697_1|ARO_3000491|acrD	0.269231	0.75	0	0
gb|NP_417544_5|ARO_3000024|patA	0.307692	0.875	0.333333	0
gb|AAA22851_1|ARO_3000179|tet(L)	0.230769	0	0	1
gb|YP_489201_1|ARO_3003390|Escherichia	0.282051	0.75	0	0
gb|AFH35853_1|ARO_3001328|mdfA	0.282051	0.75	0	0
gb|AAC75314_1|ARO_3003578|PmrF	0.282051	0.75	0	0
gb|ACN32294_1|ARO_3000237|tolC	0.282051	0.75	0	0
gb|AAC75733_1|ARO_3000074|emrB	0.282051	0.75	0	0
gb|BAE78084_1|ARO_3003548|mdtN	0.282051	0.75	0	0
gb|BAA16547_1|ARO_3000027|emrA	0.282051	0.75	0	0
gb|AAC76093_1|ARO_3002986|bacA	0.282051	0.75	0	0
gb|NP_373280_1|ARO_3000124|mecI	0.24359	0.125	0.833333	0.5
gb|AAC76298_1|ARO_3000502|acrF	0.294872	0.75	0	0
gb|BAE77595_1|ARO_3003303|Escherichia	0.294872	0.75	0	0
gb|AAD01868_1|ARO_3002867|dfrF	0.0384615	0	0	0.5
gb|CDO61516_1|ARO_3003949|efrB	0.615385	0.125	0.166667	0.5
gb|AAC75137_1|ARO_3000794|mdtC	0.282051	0.75	0	0.5
gb|ABR75897_1|ARO_3003373|Klebsiella	0.423077	0.625	1	1
gb|AAC77033_1|ARO_3003381|Escherichia	0.512821	1	0.833333	1
gb|BAC11911_1|ARO_3003551|emeA	0.602564	0.125	0.166667	0.5
gb|AAD01867_1|ARO_3002875|dfrE	0.602564	0.125	0.166667	0.5
gb|NP_416715_1|ARO_3003952|YojI	0.346154	0.75	0.666667	1
gb|AAT46077_1|ARO_3000300|lsaA	0.589744	0.125	0.166667	0.5
gb|CDO61513_1|ARO_3003948|efrA	0.589744	0.125	0.166667	0.5
gb|NP_418486_1|ARO_3003511|Escherichia	0.538462	1	0.833333	1
gb|YP_489794_1|ARO_3000263|marA	0.5	1	0.833333	0.5
gb|CDO13981_1|ARO_3003585|Klebsiella	0.538462	0.875	1	1
gb|AGC51118_1|ARO_3000617|mecA	0.5	0.75	1	1
gb|NP_415804_1|ARO_3004045|antibiotic	0.564103	1	0.833333	1
gb|YP_001569085_1|ARO_3000621|PC1	0.461538	0.25	1	0.5
gb|NP_312937_1|ARO_3003288|Escherichia	0.653846	1	1	1
gb|NP_462089_1|ARO_3003939|Salmonella	0.307692	0.75	0.166667	0.5
gb|CDJ73208|ARO_3003890|Escherichia	0.666667	1	1	1
gb|ACC85616_1|ARO_3002804|FosA2	0.0641026	0	0	0.5
gb|AAL12234_1|ARO_3003552|fusB	0.205128	0.25	0.666667	0
gb|NP_863643_1|ARO_3002597|AAC(6_)-Ie-APH(2__)-Ia	0.576923	0.375	1	1
gb|NP_417169_1|ARO_3000516|emrR	0.679487	1	1	1
gb|YP_003283625_1|ARO_3000178|tet(K)	0.230769	0.375	0.666667	0
gb|NP_460903_1|ARO_3000826|sdiA	0.692308	1	1	1
gb|ABG77965_1|ARO_3004042|Enterobacter	0.705128	1	1	1
gb|BAE77933_1|ARO_3000518|CRP	0.705128	1	1	1
gb|YP_001693238|ARO_3003923|oqxB	0.487179	0.625	0	0.5
gb|AAU10334_1|ARO_3002628|aad(6)	0.371795	0.125	0	0
gb|AGV10830_1|ARO_3002647|APH(3_)-IIIa	0.410256	0.25	0	0
gb|YP_039482_1|ARO_3003301|Staphylococcus	0.269231	0	0	0
gb|AAA25655_1|ARO_3002670|cat	0.0512821	0.25	0	0
gb|AAD12753_1|ARO_3000177|tet(J)	0.0512821	0.25	0	0
gb|CAA67349_1|ARO_3003359|Streptomyces	0.102564	0	0	0.5
gb|AAB53445_1|ARO_3002897|SAT-4	0.410256	0.375	0	0
gb|YP_001245420_1|ARO_3000215|mecR1	0.461538	0.5	0.833333	1
gb|NP_358469_1|ARO_3000822|pmrA	0.115385	0	0	0.5
gb|YP_002743273_1|ARO_3000616|mel	0.307692	0.5	0	0
gb|AAF86219_1|ARO_3000375|ErmB	0.320513	0	0.166667	0
gb|YP_001332362_1|ARO_3000838|arlR	0.24359	0	0	0
gb|AEJ33969_1|ARO_3000410|sul1	0.24359	0	0	0
gb|WP_002530866_1|ARO_3003974|Propionibacterium	0.371795	0.375	0	0
gb|YP_001440920_1|ARO_3000746|mepR	0.307692	0.125	0	0
gb|AFK13828_1|ARO_3000823|ramA	0.192308	0.375	0	0.5
gb|AAV80464_1|ARO_3000565|tet(38)	0.294872	0.125	0	0
gb|YP_001693237_1|ARO_3003922|oqxA	0.307692	0.125	0	0.5
gb|AAC75089_1|ARO_3003577|PmrE	0.205128	0	0	0
gb|ANK04027_1|ARO_3003838|gadW	0.192308	0	0	0
gb|YP_499945_1|ARO_3000839|arlS	0.269231	0.125	0	0
gb|AAU95768_1|ARO_3000026|mepA	0.179487	0	0	0
gb|NP_415222_1|ARO_3003841|kdpE	0.179487	0	0	0
gb|AGN33258_1|ARO_3002829|vgaA	0.141026	0.375	0.166667	0
gb|ADJ67256|ARO_3003319|Staphylococcus	0.25641	0.125	0	0
gb|YP_040771_1|ARO_3003315|Staphylococcus	0.25641	0.125	0	0
gb|YP_500802_1|ARO_3003074|Staphylococcus	0.25641	0.125	0	0
gb|AAG03357_1|ARO_3000596|ErmX	0.282051	0.25	0	0
gb|WP_001025093|ARO_3003323|Staphylococcus	0.24359	0.125	0	0
gb|YP_003281576_1|ARO_3000815|mgrA	0.730769	0.75	1	1
gb|ABK33456_1|ARO_3002639|APH(3__)-Ib	0.153846	0	0	0
gb|AFK13827_1|ARO_3000825|robA	0.269231	0.25	0	0.5
gb|AIT76113_1|ARO_3002174|MIR-9	0.25641	0.25	0	0.5
gb|AET10445_1|ARO_3004033|tetB(46)	0.141026	0	0	0
gb|YP_008997281_1|ARO_3002626|ANT(6)-Ia	0.141026	0	0	0
gb|AET15272_1|ARO_3003197|aadA25	0.141026	0	0	0
gb|AHA80960_1|ARO_3001388|TEM-211	0.141026	0	0	0
gb|YP_039996_1|ARO_3003285|Staphylococcus_gb|YP_039996_1|ARO_3003287|Staphylococcus	0.217949	0.125	0	0
gb|AAO04716_1|ARO_3002865|dfrC	0.628205	0.75	0.833333	1
gb|YP_039997_1|ARO_3003291|Staphylococcus	0.307692	0.125	0.166667	0
gb|CAE51638_1|ARO_3002641|APH(3_)-Ia	0.128205	0	0	0
gb|YP_039483_1|ARO_3003296|Staphylococcus	0.205128	0.125	0	0
gb|NP_899170_1|ARO_3000599|Erm(33)	0.589744	0.75	0.833333	0.5
gb|BAA03776_1|ARO_3000316|mphA	0.115385	0	0	0
gb|AAF17880_1|ARO_3002605|aadA5	0.115385	0	0	0
gb|AAS68233_1|ARO_3000391|norA	0.717949	0.875	0.833333	1
gb|AAA98296_1|ARO_3000250|ErmC	0.576923	0.5	0.833333	0.5
gb|AAC23556_1|ARO_3002660|APH(6)-Id	0.179487	0.125	0	0
gb|AET10444_1|ARO_3004032|tetA(46)	0.102564	0	0	0
gb|AAB49832_1|ARO_3002636|APH(2__)-IIIa	0.102564	0	0	0
gb|ABG91835_1|ARO_3002860|dfrA17	0.102564	0	0	0
gb|AAS13767_1|ARO_3003839|Mrx	0.102564	0	0	0
gb|AAL59753_1|ARO_3000412|sul2	0.102564	0	0	0
gb|CAJ67339_1|ARO_3000186|tetM	0.141026	0	0.166667	0
gb|YP_186749_1|ARO_3000489|sav1866	0.166667	0.125	0	0
gb|CAE00499_1|ARO_3003835|cdeA	0.0769231	0	0	0
gb|CAA63498_1|ARO_3002670|cat	0.0769231	0	0	0
gb|YP_001086469_1|ARO_3003995|Clostridium	0.0769231	0	0	0
gb|WP_009887863_1|ARO_3003357|Clostridium	0.0769231	0	0	0
gb|NP_461214_1|ARO_3003926|Salmonella	0.474359	0.375	0.666667	0.5
gb|AAK01167_1|ARO_3002819|msrC	0.0641026	0	0	0
gb|ALL09868|ARO_3003092|Enterococcus	0.0641026	0	0	0
gb|AFK58561_1|ARO_3003079|Enterococcus	0.0641026	0	0	0
gb|AFK58562_1|ARO_3003078|Enterococcus	0.0641026	0	0	0
gb|YP_006374661_1|ARO_3003438|Enterococcus	0.0641026	0	0	0
gb|AAB63533_1|ARO_3002556|AAC(6_)-Ii	0.0641026	0	0	0
gb|ACT97371_1|ARO_3003097|CfxA6	0.0641026	0	0	0
gb|BAJ09383_1|ARO_3003046|qacA	0.666667	0.625	0.833333	0.5
gb|YP_208874_1|ARO_3003930|rpsJ	0.102564	0.125	0	0
gb|AAY32951_1|ARO_3002837|lnuC	0.0769231	0.125	0	0
gb|NP_358969_1|ARO_3000025|patB	0.0512821	0	0	0
gb|AAA26613_1|ARO_3002670|cat	0.0512821	0	0	0
gb|AHV80711_1|ARO_3002863|dfrA8	0.0512821	0	0	0
gb|YP_006938491_1|ARO_3003905|ANT(4_)-Ib	0.538462	0.375	0.5	0.5
gb|CCP46624_1|ARO_3003326|Mycobacterium_gb|AAK48268_1|ARO_3003465|Mycobacterium	0.0384615	0	0	0
gb|NP_359110_1|ARO_3003042|Streptococcus	0.0384615	0	0	0
gb|YP_008997285_1|ARO_3000615|mefA	0.0384615	0	0	0
gb|ACA23185_1|ARO_3000194|tetW	0.0384615	0	0	0
gb|WP_014065640_1|ARO_3003924|Haemophilus	0.0384615	0	0	0
gb|AAA88675_1|ARO_3000498|ErmF	0.0384615	0	0	0
gb|CAA38525_1|ARO_3002535|AAC(3)-IIc	0.0384615	0	0	0
gb|AEM44648_1|ARO_3001970|CTX-M-110	0.0384615	0	0	0
gb|AEA37904_1|ARO_3003112|lsaC	0.025641	0	0	0
gb|AAC36915_1|ARO_3000593|ErmQ	0.025641	0	0	0
gb|ACT97415_1|ARO_3002999|CblA-1	0.025641	0	0	0
gb|CAL44992_1|ARO_3002835|lnuA	0.025641	0	0	0
gb|YP_001315192_1|ARO_3000347|ErmA	0.025641	0	0	0
gb|WP_041918279_1|ARO_3003925|Haemophilus	0.025641	0	0	0
gb|CAA79727_1|ARO_3000191|tetQ	0.025641	0	0	0
gb|AAF01499_1|ARO_3000193|tetT	0.0128205	0	0	0
gb|AJF83452_1|ARO_3003574|LpxC	0.0128205	0	0	0
gb|AAA27471_1|ARO_3000205|tetX	0.0128205	0	0	0
gb|AAL08441_1|ARO_3002670|cat	0.0128205	0	0	0
gb|CAC19929_1|ARO_3002854|dfrA1	0.0128205	0	0	0
gb|BAD95494_1|ARO_3002895|SAT-1	0.0128205	0	0	0
